# Supplementary material for: Network Pharmacology and Molecular Docking Study of the Chinese Miao Medicine LiuYueHuanYang in the Treatment Of Osteoarthritis
Source: Research Square preprint supplement (doi:10.21203/rs.3.rs-4581747/v1), 2024-07-03
Supplement: Supplementary file 1 [file dc73cd12b2f643b5cf60f7ba.xlsx]

## Sheet: 六月还阳总成份名称
L1	(-)-Table gallocatechin-3-0-gallate	/	从文献中查询到34中成分，通过Pubmed查到23中成分2D结构，不能查询用/表示
L2	(2'R)-phaselic acid		swiss预测结果：23个成分中有6个成分由于分子量过大不能预测靶点，不能预测用*表示
L3	dioctadecylsulfide
L4	1-hexadecanol
L5	4-Hydroxybenzaldehyde	*
L6	4-Hydroxyphenethyl alcohol
L7	arbutin
L8	daucosterol	*
L9	echinochlorin A	*
L10	glucosyringic acid
L11	guajavarin
L12	iriflophene
L13	isomotiol
L14	ISOQUERCITRIN
L15	isorhamnetin-3-0-a-L-alabinopyranoside	/
L16	isorhamnetin-3-0-β-D-xylopyranoside	/
L17	kaempferol
L18	KAEMPFEROL 3-O-GLUCORHAMNOSIDE	*
L19	koaburaside
L20	Methyl gallate
L21	myricetin-3-0-β-D-glucopyranoside	/
L22	myricetin-3'-β-D-glucopyranoside	/
L23	Myricitrin
L24	n-triacoitanoicacid	/
L25	p-hydroxybenzoylarbutin	/
L26	picein
L27	pyroside
L28	quercetin
L29	quercetin-3-0-a-L-arabinopyranoside	/
L30	QUERCETIN-3-O-B-D-GLUCOSE-6''-ACETATE(RG)	/
L31	rhamnetin-3-0-β-D-glucopyranoside	/
L32	taraxerone	*
L33	β-sitosterol	*
L34	β-sitosteryl inoleate	/

## Sheet: 成分靶点＞0的
L1	Beta amyloid A4 protein	APP	P05067	CHEMBL2487	Membrane receptor	0.0978745
L1	Matrix metalloproteinase 13	MMP13	P45452	CHEMBL280	Protease	0.0978745
L1	Matrix metalloproteinase 12	MMP12	P39900	CHEMBL4393	Protease	0.0978745
L1	Transthyretin	TTR	P02766	CHEMBL3194	Secreted protein	0.0978745
L1	Matrix metalloproteinase 2	MMP2	P08253	CHEMBL333	Protease	0.0978745
L1	Matrix metalloproteinase 1	MMP1	P03956	CHEMBL332	Protease	0.0978745
L1	Leucine aminopeptidase	LAP3	P28838	CHEMBL3965	Protease	0.0978745
L1	Endothelin-converting enzyme 1	ECE1	P42892	CHEMBL4791	Protease	0.0978745
L1	Liver glycogen phosphorylase	PYGL	P06737	CHEMBL2568	Enzyme	0.0978745
L1	Matrix metalloproteinase 9	MMP9	P14780	CHEMBL321	Protease	0.0978745
L1	Aldose reductase	AKR1B1	P15121	CHEMBL1900	Enzyme	0.0978745
L1	Angiotensin-converting enzyme	ACE	P12821	CHEMBL1808	Protease	0.0978745
L1	Receptor protein-tyrosine kinase erbB-2	ERBB2	P04626	CHEMBL1824	Kinase	0.0978745
L1	Estrogen receptor alpha	ESR1	P03372	CHEMBL206	Nuclear receptor	0.0978745
L1	Norepinephrine transporter	SLC6A2	P23975	CHEMBL222	Electrochemical transporter	0.0978745
L1	MAP kinase ERK2	MAPK1	P28482	CHEMBL4040	Kinase	0.0978745
L1	Aldo-keto reductase family 1 member C4	AKR1C4	P17516	CHEMBL4999	Enzyme	0.0978745
L1	Aldo-keto reductase family 1 member C2	AKR1C2	P52895	CHEMBL5847	Enzyme	0.0978745
L1	Solute carrier family 13 member 5	SLC13A5	Q86YT5	CHEMBL3769293	Electrochemical transporter	0.0978745
L1	Glutamate carboxypeptidase II	FOLH1	Q04609	CHEMBL1892	Protease	0.0978745
L1	Leukocyte elastase	ELANE	P08246	CHEMBL248	Protease	0.0978745
L1	NAALADase II	NAALAD2	Q9Y3Q0	CHEMBL2609	Protease	0.0978745
L2	Epoxide hydratase	EPHX2	P34913	CHEMBL2409	Protease	0.125687
L3	Transient receptor potential cation channel subfamily M member 8	TRPM8	Q7Z2W7	CHEMBL1075319	Voltage-gated ion channel	0.138924
L3	Carbonic anhydrase II	CA2	P00918	CHEMBL205	Lyase	0.0849972
L3	Carbonic anhydrase I	CA1	P00915	CHEMBL261	Lyase	0.0849972
L3	Carbonic anhydrase IV	CA4	P22748	CHEMBL3729	Lyase	0.0849972
L3	Dual specificity phosphatase Cdc25A	CDC25A	P30304	CHEMBL3775	Phosphatase	0.0759736
L3	Dual specificity phosphatase Cdc25B	CDC25B	P30305	CHEMBL4804	Phosphatase	0.0759736
L3	Androgen Receptor	AR	P10275	CHEMBL1871	Nuclear receptor	0.066975
L3	Nuclear receptor subfamily 1 group I member 3	NR1I3	Q14994	CHEMBL5503	Nuclear receptor	0.0579569
L3	Testis-specific androgen-binding protein	SHBG	P04278	CHEMBL3305	Secreted protein	0.0579569
L3	Estrogen receptor alpha	ESR1	P03372	CHEMBL206	Nuclear receptor	0.0489529
L3	Estrogen receptor beta	ESR2	Q92731	CHEMBL242	Nuclear receptor	0.0489529
L3	UDP-glucuronosyltransferase 2B7	UGT2B7	P16662	CHEMBL4370	Enzyme	0.0489529
L3	Sonic hedgehog protein (by homology)	SHH	Q15465	CHEMBL5602	Unclassified protein	0.0489529
L3	11-beta-hydroxysteroid dehydrogenase 1	HSD11B1	P28845	CHEMBL4235	Enzyme	0.0489529
L3	Bile acid receptor FXR	NR1H4	Q96RI1	CHEMBL2047	Nuclear receptor	0.0489529
L3	Niemann-Pick C1-like protein 1	NPC1L1	Q9UHC9	CHEMBL2027	Other membrane protein	0.0489529
L3	Epoxide hydratase	EPHX2	P34913	CHEMBL2409	Protease	0.0489529
L3	Cannabinoid receptor 1 (by homology)	CNR1	P21554	CHEMBL218	Family A G protein-coupled receptor	0.0489529
L3	Isoprenylcysteine carboxyl methyltransferase	ICMT	O60725	CHEMBL4699	Enzyme	0.0489529
L3	DNA polymerase alpha subunit	POLA1	P09884	CHEMBL1828	Transferase	0.0489529
L3	Cannabinoid receptor 2 (by homology)	CNR2	P34972	CHEMBL253	Family A G protein-coupled receptor	0.0489529
L3	G-protein coupled bile acid receptor 1	GPBAR1	Q8TDU6	CHEMBL5409	Family A G protein-coupled receptor	0.0489529
L3	Vanilloid receptor	TRPV1	Q8NER1	CHEMBL4794	Voltage-gated ion channel	0.0489529
L3	Nuclear receptor ROR-gamma	RORC	P51449	CHEMBL1741186	Nuclear receptor	0.0489529
L3	TNF-alpha	TNF	P01375	CHEMBL1825	Secreted protein	0.0489529
L3	Acetyl-CoA carboxylase 2	ACACB	O00763	CHEMBL4829	Ligase	0.0489529
L3	Acyl-CoA desaturase	SCD	O00767	CHEMBL5555	Enzyme	0.0489529
L3	Anandamide amidohydrolase	FAAH	O00519	CHEMBL2243	Enzyme	0.0489529
L3	Acetylcholinesterase	ACHE	P22303	CHEMBL220	Hydrolase	0.0489529
L3	Dynamin-1	DNM1	Q05193	CHEMBL4958	Enzyme	0.0489529
L3	LXR-alpha	NR1H3	Q13133	CHEMBL2808	Nuclear receptor	0.0489529
L3	Sphingosine 1-phosphate receptor Edg-3	S1PR3	Q99500	CHEMBL3892	Family A G protein-coupled receptor	0.0489529
L3	Sphingosine 1-phosphate receptor Edg-1	S1PR1	P21453	CHEMBL4333	Family A G protein-coupled receptor	0.0489529
L3	Intercellular adhesion molecule (ICAM-1), Integrin alpha-L/beta-2	ITGAL ICAM1 ITGB2	P20701 P05362 P05107	CHEMBL2096661	Membrane receptor	0.0489529
L3	Nuclear receptor ROR-alpha	RORA	P35398	CHEMBL5868	Nuclear receptor	0.0489529
L3	Smoothened homolog	SMO	Q99835	CHEMBL5971	Frizzled family G protein-coupled receptor	0.0489529
L3	Muscarinic acetylcholine receptor M4	CHRM4	P08173	CHEMBL1821	Family A G protein-coupled receptor	0.0489529
L3	Muscarinic acetylcholine receptor M5	CHRM5	P08912	CHEMBL2035	Family A G protein-coupled receptor	0.0489529
L3	Muscarinic acetylcholine receptor M2	CHRM2	P08172	CHEMBL211	Family A G protein-coupled receptor	0.0489529
L3	Muscarinic acetylcholine receptor M1	CHRM1	P11229	CHEMBL216	Family A G protein-coupled receptor	0.0489529
L3	Muscarinic acetylcholine receptor M3	CHRM3	P20309	CHEMBL245	Family A G protein-coupled receptor	0.0489529
L4	Carbonic anhydrase II	CA2	P00918	CHEMBL205	Lyase	0.0649511
L4	Carbonic anhydrase VII	CA7	P43166	CHEMBL2326	Lyase	0.0649511
L4	Carbonic anhydrase I	CA1	P00915	CHEMBL261	Lyase	0.0649511
L4	Carbonic anhydrase III	CA3	P07451	CHEMBL2885	Lyase	0.0649511
L4	Carbonic anhydrase VI	CA6	P23280	CHEMBL3025	Lyase	0.0649511
L4	Carbonic anhydrase XII	CA12	O43570	CHEMBL3242	Lyase	0.0649511
L4	Carbonic anhydrase XIV	CA14	Q9ULX7	CHEMBL3510	Lyase	0.0649511
L4	Carbonic anhydrase IX	CA9	Q16790	CHEMBL3594	Lyase	0.0649511
L4	Carbonic anhydrase IV	CA4	P22748	CHEMBL3729	Lyase	0.0649511
L4	Carbonic anhydrase VB	CA5B	Q9Y2D0	CHEMBL3969	Lyase	0.0649511
L4	Carbonic anhydrase VA	CA5A	P35218	CHEMBL4789	Lyase	0.0649511
L4	Carbonic anhydrase XIII (by homology)	CA13	Q8N1Q1	CHEMBL3912	Lyase	0.0649511
L4	Serine/threonine-protein kinase/endoribonuclease IRE1	ERN1	O75460	CHEMBL1163101	Enzyme	0.0544879
L4	Catechol O-methyltransferase (by homology)	COMT	P21964	CHEMBL2023	Transferase	0.0443083
L4	Acetylcholinesterase	ACHE	P22303	CHEMBL220	Hydrolase	0.0443083
L4	Succinate semialdehyde dehydrogenase	ALDH5A1	P51649	CHEMBL1911	Oxidoreductase	0.0238327
L4	Tyrosinase (by homology)	TYR	P14679	CHEMBL1973	Oxidoreductase	0.0238327
L4	Gamma-amino-N-butyrate transaminase	ABAT	P80404	CHEMBL2044	Transferase	0.0238327
L4	Alpha-(1,3)-fucosyltransferase 7	FUT7	Q11130	CHEMBL3596077	Transferase	0.0238327
L5	Aldose reductase	AKR1B1	P15121	CHEMBL1900	Enzyme	0.112042
L5	Tyrosinase	TYR	P14679	CHEMBL1973	Oxidoreductase	0.112042
L5	Adenosine A2a receptor (by homology)	ADORA2A	P29274	CHEMBL251	Family A G protein-coupled receptor	0.112042
L5	Adenosine deaminase	ADA	P00813	CHEMBL1910	Hydrolase	0.112042
L5	Purine nucleoside phosphorylase	PNP	P00491	CHEMBL4338	Enzyme	0.112042
L5	Carbonic anhydrase VI	CA6	P23280	CHEMBL3025	Lyase	0.112042
L5	Carbonic anhydrase IV	CA4	P22748	CHEMBL3729	Lyase	0.112042
L5	Carbonic anhydrase VA	CA5A	P35218	CHEMBL4789	Lyase	0.112042
L5	Carbonic anhydrase XIV	CA14	Q9ULX7	CHEMBL3510	Lyase	0.112042
L5	P2X purinoceptor 3	P2RX3	P56373	CHEMBL2998	Ligand-gated ion channel	0.112042
L5	Cytidine deaminase	CDA	P32320	CHEMBL4502	Enzyme	0.112042
L5	Sodium/glucose cotransporter 2	SLC5A2	P31639	CHEMBL3884	Electrochemical transporter	0.112042
L5	Adenosine A3 receptor	ADORA3	P0DMS8	CHEMBL256	Family A G protein-coupled receptor	0.112042
L5	Adenosine kinase	ADK	P55263	CHEMBL3589	Enzyme	0.112042
L5	Dipeptidyl peptidase IV	DPP4	P27487	CHEMBL284	Protease	0.112042
L6	Tyrosyl-DNA phosphodiesterase 1	TDP1	Q9NUW8	CHEMBL1075138	Enzyme	0.105608
L6	Adenosine A1 receptor	ADORA1	P30542	CHEMBL226	Family A G protein-coupled receptor	0.09724
L6	Vascular endothelial growth factor receptor 2	KDR	P35968	CHEMBL279	Kinase	0.09724
L6	Endo-beta-N-acetylglucosaminidase	ENGASE	Q8NFI3	CHEMBL5172	Enzyme	0.09724
L6	Epoxide hydratase	EPHX2	P34913	CHEMBL2409	Protease	0.09724
L6	Steroid 5-alpha-reductase 1	SRD5A1	P18405	CHEMBL1787	Oxidoreductase	0.09724
L6	Leukocyte adhesion molecule-1	SELL	P14151	CHEMBL3161	Adhesion	0.09724
L6	Bifunctional protein NCOAT	OGA	O60502	CHEMBL5921	Enzyme	0.09724
L6	Aldose reductase (by homology)	AKR1B1	P15121	CHEMBL1900	Enzyme	0.09724
L6	Maltase-glucoamylase	MGAM	O43451	CHEMBL2074	Hydrolase	0.09724
L7	Aldose reductase (by homology)	AKR1B1	P15121	CHEMBL1900	Enzyme	1
L7	Carbonic anhydrase II	CA2	P00918	CHEMBL205	Lyase	0.886817
L7	Carbonic anhydrase VII	CA7	P43166	CHEMBL2326	Lyase	0.886817
L7	Carbonic anhydrase XII	CA12	O43570	CHEMBL3242	Lyase	0.886817
L7	Carbonic anhydrase IV	CA4	P22748	CHEMBL3729	Lyase	0.886817
L7	NADPH oxidase 4	NOX4	Q9NPH5	CHEMBL1250375	Enzyme	0.812641
L7	Adrenergic receptor alpha-2	ADRA2C	P18825	CHEMBL1916	Family A G protein-coupled receptor	0.812641
L7	Acetylcholinesterase	ACHE	P22303	CHEMBL220	Hydrolase	0.770431
L7	Quinone reductase 2	NQO2	P16083	CHEMBL3959	Enzyme	0.649779
L7	Ribosomal protein S6 kinase alpha 3	RPS6KA3	P51812	CHEMBL2345	Kinase	0.384308
L7	Neuromedin-U receptor 2	NMUR2	Q9GZQ4	CHEMBL1075144	Family A G protein-coupled receptor	0.19929
L7	Alpha-2a adrenergic receptor	ADRA2A	P08913	CHEMBL1867	Family A G protein-coupled receptor	0.19929
L7	Cyclooxygenase-2	PTGS2	P35354	CHEMBL230	Oxidoreductase	0.151058
L7	Lymphocyte differentiation antigen CD38	CD38	P28907	CHEMBL4660	Enzyme	0.134972
L7	Phosphodiesterase 5A	PDE5A	O76074	CHEMBL1827	Phosphodiesterase	0.126929
L7	TNF-alpha	TNF	P01375	CHEMBL1825	Secreted protein	0.118883
L7	Interleukin-2	IL2	P60568	CHEMBL5880	Secreted protein	0.118883
L7	Adenosine A1 receptor (by homology)	ADORA1	P30542	CHEMBL226	Family A G protein-coupled receptor	0.118883
L7	Xanthine dehydrogenase	XDH	P47989	CHEMBL1929	Oxidoreductase	0.118883
L7	Arachidonate 5-lipoxygenase	ALOX5	P09917	CHEMBL215	Oxidoreductase	0.118883
L7	Equilibrative nucleoside transporter 1	SLC29A1	Q99808	CHEMBL1997	Electrochemical transporter	0.118883
L7	Telomerase reverse transcriptase	TERT	O14746	CHEMBL2916	Enzyme	0.118883
L8	Fatty acid synthase	FASN	P49327	CHEMBL4158	Transferase	0.235117
L8	Induced myeloid leukemia cell differentiation protein Mcl-1	MCL1	Q07820	CHEMBL4361	Other cytosolic protein	0.062622
L8	Arachidonate 5-lipoxygenase	ALOX5	P09917	CHEMBL215	Oxidoreductase	0.0535561
L8	Apoptosis regulator Bcl-2	BCL2	P10415	CHEMBL4860	Other ion channel	0.0535561
L8	Corticotropin releasing factor receptor 1	CRHR1	P34998	CHEMBL1800	Family B G protein-coupled receptor	0.0535561
L8	Dopamine D3 receptor	DRD3	P35462	CHEMBL234	Family A G protein-coupled receptor	0.0535561
L8	Estrogen receptor beta	ESR2	Q92731	CHEMBL242	Nuclear receptor	0.0535561
L8	Microtubule-associated protein tau	MAPT	P10636	CHEMBL1293224	Unclassified protein	0.0535561
L8	Estrogen receptor alpha	ESR1	P03372	CHEMBL206	Nuclear receptor	0.0535561
L8	Steroid 5-alpha-reductase 2	SRD5A2	P31213	CHEMBL1856	Oxidoreductase	0.0535561
L8	Tyrosine-protein kinase SRC	SRC	P12931	CHEMBL267	Kinase	0.0535561
L8	Casein kinase II alpha	CSNK2A1	P68400	CHEMBL3629	Kinase	0.0535561
L8	Androgen Receptor	AR	P10275	CHEMBL1871	Nuclear receptor	0.0535561
L8	Serotonin 6 (5-HT6) receptor	HTR6	P50406	CHEMBL3371	Family A G protein-coupled receptor	0.0535561
L8	Estrogen-related receptor gamma	ESRRG	P62508	CHEMBL4245	Nuclear receptor	0.0535561
L8	Dual-specificity tyrosine-phosphorylation regulated kinase 1A	DYRK1A	Q13627	CHEMBL2292	Kinase	0.0535561
L8	Dual specificty protein kinase CLK1	CLK1	P49759	CHEMBL4224	Kinase	0.0535561
L8	Dual specificity tyrosine-phosphorylation-regulated kinase 1B	DYRK1B	Q9Y463	CHEMBL5543	Kinase	0.0535561
L8	Cannabinoid receptor 1	CNR1	P21554	CHEMBL218	Family A G protein-coupled receptor	0.0535561
L8	Cannabinoid receptor 2	CNR2	P34972	CHEMBL253	Family A G protein-coupled receptor	0.0535561
L8	Receptor-type tyrosine-protein phosphatase S	PTPRS	Q13332	CHEMBL2396508	Phosphatase	0.0535561
L8	Calcium-activated potassium channel subunit alpha-1	KCNMA1	Q12791	CHEMBL4304	Voltage-gated ion channel	0.0535561
L8	Protein-tyrosine phosphatase 1B	PTPN1	P18031	CHEMBL335	Phosphatase	0.0535561
L8	Glutathione S-transferase A1	GSTA1	P08263	CHEMBL3409	Enzyme	0.0535561
L8	Heat shock protein HSP 90-alpha	HSP90AA1	P07900	CHEMBL3880	Other cytosolic protein	0.0535561
L8	Carboxylesterase 2	CES2	O00748	CHEMBL3180	Enzyme	0.0535561
L8	Troponin, cardiac muscle	TNNC1 TNNT2 TNNI3	P63316 P45379 P19429	CHEMBL2095202	Unclassified protein	0.0535561
L8	Heat shock cognate 71 kDa protein	HSPA8	P11142	CHEMBL1275223	Other cytosolic protein	0.0535561
L8	Dual specificity phosphatase Cdc25A	CDC25A	P30304	CHEMBL3775	Phosphatase	0.0535561
L8	Flap endonuclease 1	FEN1	P39748	CHEMBL5027	Enzyme	0.0535561
L8	Heat shock 70 kDa protein 1	HSPA1A	P0DMV8	CHEMBL5460	Other cytosolic protein	0.0535561
L8	Succinate semialdehyde dehydrogenase	ALDH5A1	P51649	CHEMBL1911	Oxidoreductase	0.0535561
L8	Gamma-amino-N-butyrate transaminase	ABAT	P80404	CHEMBL2044	Transferase	0.0535561
L9	Fatty acid synthase	FASN	P49327	CHEMBL4158	Transferase	0.235117
L9	Induced myeloid leukemia cell differentiation protein Mcl-1	MCL1	Q07820	CHEMBL4361	Other cytosolic protein	0.062622
L9	Arachidonate 5-lipoxygenase	ALOX5	P09917	CHEMBL215	Oxidoreductase	0.0535561
L9	Apoptosis regulator Bcl-2	BCL2	P10415	CHEMBL4860	Other ion channel	0.0535561
L9	Corticotropin releasing factor receptor 1	CRHR1	P34998	CHEMBL1800	Family B G protein-coupled receptor	0.0535561
L9	Dopamine D3 receptor	DRD3	P35462	CHEMBL234	Family A G protein-coupled receptor	0.0535561
L9	Estrogen receptor beta	ESR2	Q92731	CHEMBL242	Nuclear receptor	0.0535561
L9	Microtubule-associated protein tau	MAPT	P10636	CHEMBL1293224	Unclassified protein	0.0535561
L9	Estrogen receptor alpha	ESR1	P03372	CHEMBL206	Nuclear receptor	0.0535561
L9	Steroid 5-alpha-reductase 2	SRD5A2	P31213	CHEMBL1856	Oxidoreductase	0.0535561
L9	Tyrosine-protein kinase SRC	SRC	P12931	CHEMBL267	Kinase	0.0535561
L9	Casein kinase II alpha	CSNK2A1	P68400	CHEMBL3629	Kinase	0.0535561
L9	Androgen Receptor	AR	P10275	CHEMBL1871	Nuclear receptor	0.0535561
L9	Serotonin 6 (5-HT6) receptor	HTR6	P50406	CHEMBL3371	Family A G protein-coupled receptor	0.0535561
L9	Estrogen-related receptor gamma	ESRRG	P62508	CHEMBL4245	Nuclear receptor	0.0535561
L9	Dual-specificity tyrosine-phosphorylation regulated kinase 1A	DYRK1A	Q13627	CHEMBL2292	Kinase	0.0535561
L9	Dual specificty protein kinase CLK1	CLK1	P49759	CHEMBL4224	Kinase	0.0535561
L9	Dual specificity tyrosine-phosphorylation-regulated kinase 1B	DYRK1B	Q9Y463	CHEMBL5543	Kinase	0.0535561
L9	Cannabinoid receptor 1	CNR1	P21554	CHEMBL218	Family A G protein-coupled receptor	0.0535561
L9	Cannabinoid receptor 2	CNR2	P34972	CHEMBL253	Family A G protein-coupled receptor	0.0535561
L9	Receptor-type tyrosine-protein phosphatase S	PTPRS	Q13332	CHEMBL2396508	Phosphatase	0.0535561
L9	Calcium-activated potassium channel subunit alpha-1	KCNMA1	Q12791	CHEMBL4304	Voltage-gated ion channel	0.0535561
L9	Protein-tyrosine phosphatase 1B	PTPN1	P18031	CHEMBL335	Phosphatase	0.0535561
L9	Glutathione S-transferase A1	GSTA1	P08263	CHEMBL3409	Enzyme	0.0535561
L9	Heat shock protein HSP 90-alpha	HSP90AA1	P07900	CHEMBL3880	Other cytosolic protein	0.0535561
L9	Carboxylesterase 2	CES2	O00748	CHEMBL3180	Enzyme	0.0535561
L9	Troponin, cardiac muscle	TNNC1 TNNT2 TNNI3	P63316 P45379 P19429	CHEMBL2095202	Unclassified protein	0.0535561
L9	Heat shock cognate 71 kDa protein	HSPA8	P11142	CHEMBL1275223	Other cytosolic protein	0.0535561
L9	Dual specificity phosphatase Cdc25A	CDC25A	P30304	CHEMBL3775	Phosphatase	0.0535561
L9	Flap endonuclease 1	FEN1	P39748	CHEMBL5027	Enzyme	0.0535561
L9	Heat shock 70 kDa protein 1	HSPA1A	P0DMV8	CHEMBL5460	Other cytosolic protein	0.0535561
L9	Succinate semialdehyde dehydrogenase	ALDH5A1	P51649	CHEMBL1911	Oxidoreductase	0.0535561
L9	Gamma-amino-N-butyrate transaminase	ABAT	P80404	CHEMBL2044	Transferase	0.0535561
L10	Aldose reductase	AKR1B1	P15121	CHEMBL1900	Enzyme	1
L10	Carbonic anhydrase II	CA2	P00918	CHEMBL205	Lyase	1
L10	Carbonic anhydrase VII	CA7	P43166	CHEMBL2326	Lyase	1
L10	Carbonic anhydrase XII	CA12	O43570	CHEMBL3242	Lyase	1
L10	Carbonic anhydrase IV	CA4	P22748	CHEMBL3729	Lyase	1
L10	NADPH oxidase 4	NOX4	Q9NPH5	CHEMBL1250375	Enzyme	0.998137
L10	Adrenergic receptor alpha-2	ADRA2C	P18825	CHEMBL1916	Family A G protein-coupled receptor	0.998137
L10	Acetylcholinesterase	ACHE	P22303	CHEMBL220	Hydrolase	0.831337
L10	Quinone reductase 2	NQO2	P16083	CHEMBL3959	Enzyme	0.603462
L10	Ribosomal protein S6 kinase alpha 3	RPS6KA3	P51812	CHEMBL2345	Kinase	0.427429
L10	Neuromedin-U receptor 2	NMUR2	Q9GZQ4	CHEMBL1075144	Family A G protein-coupled receptor	0.335259
L10	Alpha-2a adrenergic receptor	ADRA2A	P08913	CHEMBL1867	Family A G protein-coupled receptor	0.335259
L10	Cyclooxygenase-2	PTGS2	P35354	CHEMBL230	Oxidoreductase	0.176055
L10	Lymphocyte differentiation antigen CD38	CD38	P28907	CHEMBL4660	Enzyme	0.134155
L10	Phosphodiesterase 5A	PDE5A	O76074	CHEMBL1827	Phosphodiesterase	0.109013
L10	TNF-alpha	TNF	P01375	CHEMBL1825	Secreted protein	0.100634
L10	Interleukin-2	IL2	P60568	CHEMBL5880	Secreted protein	0.100634
L10	Adenosine A1 receptor (by homology)	ADORA1	P30542	CHEMBL226	Family A G protein-coupled receptor	0.100634
L10	Xanthine dehydrogenase	XDH	P47989	CHEMBL1929	Oxidoreductase	0.100634
L10	Arachidonate 5-lipoxygenase	ALOX5	P09917	CHEMBL215	Oxidoreductase	0.100634
L10	Equilibrative nucleoside transporter 1	SLC29A1	Q99808	CHEMBL1997	Electrochemical transporter	0.100634
L10	Telomerase reverse transcriptase	TERT	O14746	CHEMBL2916	Enzyme	0.100634
L11	NADPH oxidase 4	NOX4	Q9NPH5	CHEMBL1250375	Enzyme	1
L11	Aldose reductase (by homology)	AKR1B1	P15121	CHEMBL1900	Enzyme	1
L11	Xanthine dehydrogenase	XDH	P47989	CHEMBL1929	Oxidoreductase	1
L11	Tyrosinase	TYR	P14679	CHEMBL1973	Oxidoreductase	1
L11	Tyrosine-protein kinase receptor FLT3	FLT3	P36888	CHEMBL1974	Kinase	1
L11	Carbonic anhydrase II	CA2	P00918	CHEMBL205	Lyase	1
L11	Arachidonate 5-lipoxygenase	ALOX5	P09917	CHEMBL215	Oxidoreductase	1
L11	Carbonic anhydrase VII	CA7	P43166	CHEMBL2326	Lyase	1
L11	Estradiol 17-beta-dehydrogenase 2	HSD17B2	P37059	CHEMBL2789	Enzyme	1
L11	Multidrug resistance-associated protein 1	ABCC1	P33527	CHEMBL3004	Primary active transporter	1
L11	Estradiol 17-beta-dehydrogenase 1	HSD17B1	P14061	CHEMBL3181	Enzyme	1
L11	Aryl hydrocarbon receptor	AHR	P35869	CHEMBL3201	Transcription factor	1
L11	Carbonic anhydrase XII	CA12	O43570	CHEMBL3242	Lyase	1
L11	Estrogen-related receptor alpha	ESRRA	P11474	CHEMBL3429	Nuclear receptor	1
L11	P-glycoprotein 1	ABCB1	P08183	CHEMBL4302	Primary active transporter	1
L11	Cytochrome P450 1B1	CYP1B1	Q16678	CHEMBL4878	Cytochrome P450	1
L11	ATP-binding cassette sub-family G member 2	ABCG2	Q9UNQ0	CHEMBL5393	Primary active transporter	1
L12	Tyrosinase	TYR	P14679	CHEMBL1973	Oxidoreductase	0.109946
L12	Aldose reductase	AKR1B1	P15121	CHEMBL1900	Enzyme	0.101614
L12	Purine nucleoside phosphorylase	PNP	P00491	CHEMBL4338	Enzyme	0.101614
L12	Glycogen synthase kinase-3 beta	GSK3B	P49841	CHEMBL262	Kinase	0.101614
L12	Tyrosyl-DNA phosphodiesterase 1	TDP1	Q9NUW8	CHEMBL1075138	Enzyme	0.101614
L12	Adenosine deaminase	ADA	P00813	CHEMBL1910	Hydrolase	0.101614
L12	Adenosine A3 receptor	ADORA3	P0DMS8	CHEMBL256	Family A G protein-coupled receptor	0.101614
L12	Carbonic anhydrase VI	CA6	P23280	CHEMBL3025	Lyase	0.101614
L12	Carbonic anhydrase IV	CA4	P22748	CHEMBL3729	Lyase	0.101614
L12	Carbonic anhydrase VA	CA5A	P35218	CHEMBL4789	Lyase	0.101614
L12	Carbonic anhydrase VII	CA7	P43166	CHEMBL2326	Lyase	0.101614
L12	Carbonic anhydrase I	CA1	P00915	CHEMBL261	Lyase	0.101614
L12	Carbonic anhydrase XII	CA12	O43570	CHEMBL3242	Lyase	0.101614
L12	Carbonic anhydrase IX	CA9	Q16790	CHEMBL3594	Lyase	0.101614
L12	Carbonic anhydrase XIII	CA13	Q8N1Q1	CHEMBL3912	Lyase	0.101614
L12	Adenosine A2a receptor (by homology)	ADORA2A	P29274	CHEMBL251	Family A G protein-coupled receptor	0.101614
L12	Carbonic anhydrase XIV	CA14	Q9ULX7	CHEMBL3510	Lyase	0.101614
L12	Adenosine kinase	ADK	P55263	CHEMBL3589	Enzyme	0.101614
L12	Sodium/glucose cotransporter 2	SLC5A2	P31639	CHEMBL3884	Electrochemical transporter	0.101614
L12	Thymidine phosphorylase	TYMP	P19971	CHEMBL3106	Enzyme	0.101614
L13	Alpha-(1,3)-fucosyltransferase 7	FUT7	Q11130	CHEMBL3596077	Transferase	0.729303
L13	Carbonic anhydrase II	CA2	P00918	CHEMBL205	Lyase	0.212409
L13	Carbonic anhydrase VII	CA7	P43166	CHEMBL2326	Lyase	0.212409
L13	Carbonic anhydrase I	CA1	P00915	CHEMBL261	Lyase	0.212409
L13	Carbonic anhydrase XII	CA12	O43570	CHEMBL3242	Lyase	0.212409
L13	Carbonic anhydrase XIV	CA14	Q9ULX7	CHEMBL3510	Lyase	0.212409
L13	Carbonic anhydrase IX	CA9	Q16790	CHEMBL3594	Lyase	0.212409
L13	Carbonic anhydrase III	CA3	P07451	CHEMBL2885	Lyase	0.124538
L13	Carbonic anhydrase VI	CA6	P23280	CHEMBL3025	Lyase	0.124538
L13	Carbonic anhydrase IV	CA4	P22748	CHEMBL3729	Lyase	0.124538
L13	Carbonic anhydrase VB	CA5B	Q9Y2D0	CHEMBL3969	Lyase	0.124538
L13	Carbonic anhydrase VA	CA5A	P35218	CHEMBL4789	Lyase	0.124538
L13	Carbonic anhydrase XIII (by homology)	CA13	Q8N1Q1	CHEMBL3912	Lyase	0.124538
L13	Squalene monooxygenase (by homology)	SQLE	Q14534	CHEMBL3592	Enzyme	0.0981627
L13	Plasminogen activator inhibitor-1	SERPINE1	P05121	CHEMBL3475	Secreted protein	0.0981627
L13	Insulin-like growth factor I receptor	IGF1R	P08069	CHEMBL1957	Kinase	0.0893705
L13	ALK tyrosine kinase receptor	ALK	Q9UM73	CHEMBL4247	Kinase	0.0893705
L13	Estrogen receptor beta	ESR2	Q92731	CHEMBL242	Nuclear receptor	0.0893705
L13	Tyrosinase	TYR	P14679	CHEMBL1973	Oxidoreductase	0.08057
L13	Apoptosis regulator Bcl-X	BCL2L1	Q07817	CHEMBL4625	Other ion channel	0.0717872
L13	Serine/threonine-protein kinase Aurora-B	AURKB	Q96GD4	CHEMBL2185	Kinase	0.0717872
L13	Tyrosine-protein kinase SRC	SRC	P12931	CHEMBL267	Kinase	0.0717872
L13	Focal adhesion kinase 1	PTK2	Q05397	CHEMBL2695	Kinase	0.0717872
L13	Vascular endothelial growth factor receptor 2	KDR	P35968	CHEMBL279	Kinase	0.0717872
L13	Hepatocyte growth factor receptor	MET	P08581	CHEMBL3717	Kinase	0.0717872
L13	Serine/threonine-protein kinase NEK2	NEK2	P51955	CHEMBL3835	Kinase	0.0717872
L13	Tyrosine-protein kinase receptor UFO	AXL	P30530	CHEMBL4895	Kinase	0.0717872
L13	Cannabinoid receptor 2	CNR2	P34972	CHEMBL253	Family A G protein-coupled receptor	0.0717872
L13	Transthyretin	TTR	P02766	CHEMBL3194	Secreted protein	0.0717872
L13	DNA polymerase alpha subunit	POLA1	P09884	CHEMBL1828	Transferase	0.0717872
L13	DNA polymerase beta	POLB	P06746	CHEMBL2392	Enzyme	0.0717872
L14	Aldose reductase	AKR1B1	P15121	CHEMBL1900	Enzyme	0.971606
L14	Carbonic anhydrase II	CA2	P00918	CHEMBL205	Lyase	0.971606
L14	Carbonic anhydrase VII	CA7	P43166	CHEMBL2326	Lyase	0.971606
L14	Carbonic anhydrase XII	CA12	O43570	CHEMBL3242	Lyase	0.971606
L14	Carbonic anhydrase IV	CA4	P22748	CHEMBL3729	Lyase	0.971606
L14	NADPH oxidase 4	NOX4	Q9NPH5	CHEMBL1250375	Enzyme	0.888084
L14	Adrenergic receptor alpha-2	ADRA2C	P18825	CHEMBL1916	Family A G protein-coupled receptor	0.888084
L14	Acetylcholinesterase	ACHE	P22303	CHEMBL220	Hydrolase	0.779416
L14	Quinone reductase 2	NQO2	P16083	CHEMBL3959	Enzyme	0.712367
L14	Ribosomal protein S6 kinase alpha 3	RPS6KA3	P51812	CHEMBL2345	Kinase	0.611731
L14	Neuromedin-U receptor 2	NMUR2	Q9GZQ4	CHEMBL1075144	Family A G protein-coupled receptor	0.427429
L14	Alpha-2a adrenergic receptor	ADRA2A	P08913	CHEMBL1867	Family A G protein-coupled receptor	0.427429
L14	Cyclooxygenase-2	PTGS2	P35354	CHEMBL230	Oxidoreductase	0.150917
L14	Lymphocyte differentiation antigen CD38	CD38	P28907	CHEMBL4660	Enzyme	0.134155
L14	TNF-alpha	TNF	P01375	CHEMBL1825	Secreted protein	0.100634
L14	Interleukin-2	IL2	P60568	CHEMBL5880	Secreted protein	0.100634
L14	Xanthine dehydrogenase	XDH	P47989	CHEMBL1929	Oxidoreductase	0.100634
L14	Adenosine A1 receptor (by homology)	ADORA1	P30542	CHEMBL226	Family A G protein-coupled receptor	0.100634
L14	Phosphodiesterase 5A	PDE5A	O76074	CHEMBL1827	Phosphodiesterase	0.100634
L14	Arachidonate 5-lipoxygenase	ALOX5	P09917	CHEMBL215	Oxidoreductase	0.100634
L14	Equilibrative nucleoside transporter 1	SLC29A1	Q99808	CHEMBL1997	Electrochemical transporter	0.100634
L14	Telomerase reverse transcriptase	TERT	O14746	CHEMBL2916	Enzyme	0.100634
L15	Tyrosinase	TYR	P14679	CHEMBL1973	Oxidoreductase	0.114338
L15	Sodium/glucose cotransporter 2	SLC5A2	P31639	CHEMBL3884	Electrochemical transporter	0.1061
L15	Sodium/glucose cotransporter 1	SLC5A1	P13866	CHEMBL4979	Electrochemical transporter	0.0978745
L15	Epoxide hydratase	EPHX2	P34913	CHEMBL2409	Protease	0.0978745
L15	Glycogen synthase kinase-3 beta	GSK3B	P49841	CHEMBL262	Kinase	0.0978745
L15	Steroid 5-alpha-reductase 1	SRD5A1	P18405	CHEMBL1787	Oxidoreductase	0.0978745
L15	Adenosine kinase	ADK	P55263	CHEMBL3589	Enzyme	0.0978745
L15	Low affinity sodium-glucose cotransporter	SLC5A4	Q9NY91	CHEMBL1770047	Electrochemical transporter	0.0978745
L15	Beta-glucocerebrosidase	GBA	P04062	CHEMBL2179	Enzyme	0.0978745
L15	Aldose reductase	AKR1B1	P15121	CHEMBL1900	Enzyme	0.0978745
L15	Adenosine A2a receptor	ADORA2A	P29274	CHEMBL251	Family A G protein-coupled receptor	0.0978745
L15	Adenosine A3 receptor	ADORA3	P0DMS8	CHEMBL256	Family A G protein-coupled receptor	0.0978745
L15	Bifunctional protein NCOAT	OGA	O60502	CHEMBL5921	Enzyme	0.0978745
L15	Protein-tyrosine phosphatase 1B	PTPN1	P18031	CHEMBL335	Phosphatase	0.0978745
L15	Adenosine deaminase	ADA	P00813	CHEMBL1910	Hydrolase	0.0978745
L15	Heat shock cognate 71 kDa protein	HSPA8	P11142	CHEMBL1275223	Other cytosolic protein	0.0978745
L15	Rhodopsin kinase	GRK1	Q15835	CHEMBL5607	Kinase	0.0978745
L15	Cyclin-dependent kinase 2/cyclin A	CDK2 CCNA1 CCNA2	P24941 P78396 P20248	CHEMBL2094128	Other cytosolic protein	0.0978745
L15	Carbonic anhydrase XIV	CA14	Q9ULX7	CHEMBL3510	Lyase	0.0978745
L15	Alpha-L-fucosidase I	FUCA1	P04066	CHEMBL4176	Enzyme	0.0978745
L15	D-amino-acid oxidase	DAO	P14920	CHEMBL5485	Enzyme	0.0978745
L15	Glyceraldehyde-3-phosphate dehydrogenase liver	GAPDH	P04406	CHEMBL2284	Oxidoreductase	0.0978745
L15	Purine nucleoside phosphorylase	PNP	P00491	CHEMBL4338	Enzyme	0.0978745
L15	Thymidine phosphorylase	TYMP	P19971	CHEMBL3106	Enzyme	0.0978745
L15	Carbonic anhydrase VI	CA6	P23280	CHEMBL3025	Lyase	0.0978745
L15	Carbonic anhydrase IV	CA4	P22748	CHEMBL3729	Lyase	0.0978745
L15	Carbonic anhydrase VA	CA5A	P35218	CHEMBL4789	Lyase	0.0978745
L15	MAP kinase ERK2	MAPK1	P28482	CHEMBL4040	Kinase	0.0978745
L15	Adenosylhomocysteinase	AHCY	P23526	CHEMBL2664	Enzyme	0.0978745
L15	Cytidine deaminase	CDA	P32320	CHEMBL4502	Enzyme	0.0978745
L15	Thrombin	F2	P00734	CHEMBL204	Protease	0.0978745
L15	Lysosomal alpha-glucosidase	GAA	P10253	CHEMBL2608	Hydrolase	0.0978745
L15	78 kDa glucose-regulated protein	HSPA5	P11021	CHEMBL1781865	Unclassified protein	0.0978745
L15	Adenosine A1 receptor	ADORA1	P30542	CHEMBL226	Family A G protein-coupled receptor	0.0978745
L15	Matrix metalloproteinase 3	MMP3	P08254	CHEMBL283	Protease	0.0978745
L15	Matrix metalloproteinase 9	MMP9	P14780	CHEMBL321	Protease	0.0978745
L15	Matrix metalloproteinase 1	MMP1	P03956	CHEMBL332	Protease	0.0978745
L15	ADAM17	ADAM17	P78536	CHEMBL3706	Protease	0.0978745
L15	Cyclin-dependent kinase 1/cyclin B1	CDK1 CCNB1	P06493 P14635	CHEMBL1907602	Other cytosolic protein	0.0978745
L15	Carbonic anhydrase I	CA1	P00915	CHEMBL261	Lyase	0.0978745
L15	Carbonic anhydrase XII	CA12	O43570	CHEMBL3242	Lyase	0.0978745
L15	Carbonic anhydrase IX	CA9	Q16790	CHEMBL3594	Lyase	0.0978745
L15	CDK9/cyclin T1	CDK9 CCNT1	P50750 O60563	CHEMBL2111389	Other cytosolic protein	0.0978745
L15	Casein kinase II alpha	CSNK2A1	P68400	CHEMBL3629	Kinase	0.0978745
L15	Hexokinase type II	HK2	P52789	CHEMBL2640	Enzyme	0.0978745
L15	Hexokinase type I	HK1	P19367	CHEMBL2688	Enzyme	0.0978745
L15	Thymidine kinase, cytosolic	TK1	P04183	CHEMBL2883	Transferase	0.0978745
L15	Adenosine A2b receptor	ADORA2B	P29275	CHEMBL255	Family A G protein-coupled receptor	0.0978745
L15	Aldo-keto-reductase family 1 member C3	AKR1C3	P42330	CHEMBL4681	Enzyme	0.0978745
L16	Tyrosinase	TYR	P14679	CHEMBL1973	Oxidoreductase	0.111502
L16	Sodium/glucose cotransporter 2	SLC5A2	P31639	CHEMBL3884	Electrochemical transporter	0.111502
L16	Low affinity sodium-glucose cotransporter	SLC5A4	Q9NY91	CHEMBL1770047	Electrochemical transporter	0.111502
L16	Adenosine deaminase	ADA	P00813	CHEMBL1910	Hydrolase	0.111502
L16	Matrix metalloproteinase 3	MMP3	P08254	CHEMBL283	Protease	0.111502
L16	Matrix metalloproteinase 9	MMP9	P14780	CHEMBL321	Protease	0.111502
L16	Matrix metalloproteinase 1	MMP1	P03956	CHEMBL332	Protease	0.111502
L16	ADAM17	ADAM17	P78536	CHEMBL3706	Protease	0.111502
L16	Sodium/glucose cotransporter 1	SLC5A1	P13866	CHEMBL4979	Electrochemical transporter	0.111502
L16	Carbonic anhydrase VI	CA6	P23280	CHEMBL3025	Lyase	0.111502
L16	Carbonic anhydrase IV	CA4	P22748	CHEMBL3729	Lyase	0.111502
L16	Carbonic anhydrase VA	CA5A	P35218	CHEMBL4789	Lyase	0.111502
L16	Adenosine kinase	ADK	P55263	CHEMBL3589	Enzyme	0.111502
L16	Beta-glucocerebrosidase	GBA	P04062	CHEMBL2179	Enzyme	0.111502
L16	Lysosomal alpha-glucosidase	GAA	P10253	CHEMBL2608	Hydrolase	0.111502
L16	Carbonic anhydrase XIV	CA14	Q9ULX7	CHEMBL3510	Lyase	0.111502
L16	Thymidine phosphorylase	TYMP	P19971	CHEMBL3106	Enzyme	0.111502
L16	Purine nucleoside phosphorylase	PNP	P00491	CHEMBL4338	Enzyme	0.111502
L16	Adenosine A2a receptor (by homology)	ADORA2A	P29274	CHEMBL251	Family A G protein-coupled receptor	0.111502
L16	Adenosine A3 receptor	ADORA3	P0DMS8	CHEMBL256	Family A G protein-coupled receptor	0.111502
L16	Alpha-L-fucosidase I	FUCA1	P04066	CHEMBL4176	Enzyme	0.111502
L16	Matrix metalloproteinase 13	MMP13	P45452	CHEMBL280	Protease	0.111502
L16	Matrix metalloproteinase 7	MMP7	P09237	CHEMBL4073	Protease	0.111502
L16	Matrix metalloproteinase 8	MMP8	P22894	CHEMBL4588	Protease	0.111502
L16	78 kDa glucose-regulated protein	HSPA5	P11021	CHEMBL1781865	Unclassified protein	0.111502
L16	Transforming protein p21/H-Ras-1	HRAS	P01112	CHEMBL2167	Other cytosolic protein	0.111502
L16	Carbonic anhydrase III	CA3	P07451	CHEMBL2885	Lyase	0.111502
L16	Bifunctional protein NCOAT	OGA	O60502	CHEMBL5921	Enzyme	0.111502
L16	Glycogen synthase kinase-3 beta	GSK3B	P49841	CHEMBL262	Kinase	0.111502
L16	Glyceraldehyde-3-phosphate dehydrogenase liver	GAPDH	P04406	CHEMBL2284	Oxidoreductase	0.111502
L16	Adenosine A2b receptor	ADORA2B	P29275	CHEMBL255	Family A G protein-coupled receptor	0.111502
L16	D-amino-acid oxidase	DAO	P14920	CHEMBL5485	Enzyme	0.111502
L16	Heat shock cognate 71 kDa protein	HSPA8	P11142	CHEMBL1275223	Other cytosolic protein	0.111502
L16	Adenosine A1 receptor	ADORA1	P30542	CHEMBL226	Family A G protein-coupled receptor	0.111502
L16	Epoxide hydratase	EPHX2	P34913	CHEMBL2409	Protease	0.111502
L17	NADPH oxidase 4	NOX4	Q9NPH5	CHEMBL1250375	Enzyme	1
L17	Vasopressin V2 receptor	AVPR2	P30518	CHEMBL1790	Family A G protein-coupled receptor	1
L17	Aldose reductase	AKR1B1	P15121	CHEMBL1900	Enzyme	1
L17	Xanthine dehydrogenase	XDH	P47989	CHEMBL1929	Oxidoreductase	1
L17	Monoamine oxidase A	MAOA	P21397	CHEMBL1951	Oxidoreductase	1
L17	Insulin-like growth factor I receptor	IGF1R	P08069	CHEMBL1957	Kinase	1
L17	Tyrosine-protein kinase receptor FLT3	FLT3	P36888	CHEMBL1974	Kinase	1
L17	Cytochrome P450 19A1	CYP19A1	P11511	CHEMBL1978	Cytochrome P450	1
L17	Epidermal growth factor receptor erbB1	EGFR	P00533	CHEMBL203	Kinase	1
L17	Thrombin	F2	P00734	CHEMBL204	Protease	1
L17	Carbonic anhydrase II	CA2	P00918	CHEMBL205	Lyase	1
L17	Serine/threonine-protein kinase PIM1	PIM1	P11309	CHEMBL2147	Kinase	1
L17	Arachidonate 5-lipoxygenase	ALOX5	P09917	CHEMBL215	Oxidoreductase	1
L17	Serine/threonine-protein kinase Aurora-B	AURKB	Q96GD4	CHEMBL2185	Kinase	1
L17	Dopamine D4 receptor	DRD4	P21917	CHEMBL219	Family A G protein-coupled receptor	1
L17	Adenosine A1 receptor (by homology)	ADORA1	P30542	CHEMBL226	Family A G protein-coupled receptor	1
L17	Carbonic anhydrase VII	CA7	P43166	CHEMBL2326	Lyase	1
L17	Glyoxalase I	GLO1	Q04760	CHEMBL2424	Enzyme	1
L17	Myeloperoxidase	MPO	P05164	CHEMBL2439	Enzyme	1
L17	PI3-kinase p85-alpha subunit	PIK3R1	P27986	CHEMBL2506	Enzyme	1
L17	Adenosine A2a receptor (by homology)	ADORA2A	P29274	CHEMBL251	Family A G protein-coupled receptor	1
L17	Death-associated protein kinase 1	DAPK1	P53355	CHEMBL2558	Kinase	1
L17	Liver glycogen phosphorylase	PYGL	P06737	CHEMBL2568	Enzyme	1
L17	Carbonic anhydrase I	CA1	P00915	CHEMBL261	Lyase	1
L17	Glycogen synthase kinase-3 beta	GSK3B	P49841	CHEMBL262	Kinase	1
L17	Tyrosine-protein kinase SRC	SRC	P12931	CHEMBL267	Kinase	1
L17	Focal adhesion kinase 1	PTK2	Q05397	CHEMBL2695	Kinase	1
L17	Estradiol 17-beta-dehydrogenase 2	HSD17B2	P37059	CHEMBL2789	Enzyme	1
L17	Vascular endothelial growth factor receptor 2	KDR	P35968	CHEMBL279	Kinase	1
L17	Matrix metalloproteinase 13	MMP13	P45452	CHEMBL280	Protease	1
L17	Matrix metalloproteinase 3	MMP3	P08254	CHEMBL283	Protease	1
L17	Carbonic anhydrase III	CA3	P07451	CHEMBL2885	Lyase	1
L17	Arachidonate 15-lipoxygenase	ALOX15	P16050	CHEMBL2903	Enzyme	1
L17	Multidrug resistance-associated protein 1	ABCC1	P33527	CHEMBL3004	Primary active transporter	1
L17	Serine/threonine-protein kinase PLK1	PLK1	P53350	CHEMBL3024	Kinase	1
L17	Carbonic anhydrase VI	CA6	P23280	CHEMBL3025	Lyase	1
L17	Cyclin-dependent kinase 1	CDK1	P06493	CHEMBL308	Kinase	1
L17	Matrix metalloproteinase 9	MMP9	P14780	CHEMBL321	Protease	1
L17	Carbonic anhydrase XII	CA12	O43570	CHEMBL3242	Lyase	1
L17	Matrix metalloproteinase 2	MMP2	P08253	CHEMBL333	Protease	1
L17	Protein kinase N1	PKN1	Q16512	CHEMBL3384	Kinase	1
L17	Carbonic anhydrase XIV	CA14	Q9ULX7	CHEMBL3510	Lyase	1
L17	Carbonic anhydrase IX	CA9	Q16790	CHEMBL3594	Lyase	1
L17	Casein kinase II alpha	CSNK2A1	P68400	CHEMBL3629	Kinase	1
L17	Arachidonate 12-lipoxygenase	ALOX12	P18054	CHEMBL3687	Enzyme	1
L17	Hepatocyte growth factor receptor	MET	P08581	CHEMBL3717	Kinase	1
L17	Carbonic anhydrase IV	CA4	P22748	CHEMBL3729	Lyase	1
L17	Serine/threonine-protein kinase NEK2	NEK2	P51955	CHEMBL3835	Kinase	1
L17	Interleukin-8 receptor A	CXCR1	P25024	CHEMBL4029	Family A G protein-coupled receptor	1
L17	CaM kinase II beta	CAMK2B	Q13554	CHEMBL4121	Kinase	1
L17	ALK tyrosine kinase receptor	ALK	Q9UM73	CHEMBL4247	Kinase	1
L17	Serine/threonine-protein kinase AKT	AKT1	P31749	CHEMBL4282	Kinase	1
L17	P-glycoprotein 1	ABCB1	P08183	CHEMBL4302	Primary active transporter	1
L17	Serine/threonine-protein kinase NEK6	NEK6	Q9HC98	CHEMBL4309	Kinase	1
L17	Phospholipase A2 group 1B	PLA2G1B	P04054	CHEMBL4426	Enzyme	1
L17	Carbonic anhydrase VA	CA5A	P35218	CHEMBL4789	Lyase	1
L17	Beta-secretase 1	BACE1	P56817	CHEMBL4822	Protease	1
L17	Cytochrome P450 1B1	CYP1B1	Q16678	CHEMBL4878	Cytochrome P450	1
L17	Tyrosine-protein kinase receptor UFO	AXL	P30530	CHEMBL4895	Kinase	1
L17	ATP-binding cassette sub-family G member 2	ABCG2	Q9UNQ0	CHEMBL5393	Primary active transporter	1
L17	NUAK family SNF1-like kinase 1	NUAK1	O60285	CHEMBL5784	Kinase	1
L17	Aldo-keto reductase family 1 member C2 (by homology)	AKR1C2	P52895	CHEMBL5847	Enzyme	1
L17	Aldo-keto reductase family 1 member C1 (by homology)	AKR1C1	Q04828	CHEMBL5905	Enzyme	1
L17	Aldo-keto-reductase family 1 member C3 (by homology)	AKR1C3	P42330	CHEMBL4681	Enzyme	1
L17	Aldo-keto reductase family 1 member C4 (by homology)	AKR1C4	P17516	CHEMBL4999	Enzyme	1
L17	Carbonic anhydrase XIII (by homology)	CA13	Q8N1Q1	CHEMBL3912	Lyase	1
L17	Aldehyde reductase (by homology)	AKR1A1	P14550	CHEMBL2246	Enzyme	1
L17	G-protein coupled receptor 35	GPR35	Q9HC97	CHEMBL1293267	Family A G protein-coupled receptor	1

## Sheet: 成分靶点＞1
arbutin	L7	Aldose reductase (by homology)	AKR1B1	P15121	CHEMBL1900	Enzyme	1		L7	AKR1B1	P15121
glucosyringic acid	L10	Aldose reductase	AKR1B1	P15121	CHEMBL1900	Enzyme	1		L10	AKR1B1	P15121
glucosyringic acid	L10	Carbonic anhydrase II	CA2	P00918	CHEMBL205	Lyase	1		L10	CA2	P00918
glucosyringic acid	L10	Carbonic anhydrase VII	CA7	P43166	CHEMBL2326	Lyase	1		L10	CA7	P43166
glucosyringic acid	L10	Carbonic anhydrase XII	CA12	O43570	CHEMBL3242	Lyase	1		L10	CA12	O43570
glucosyringic acid	L10	Carbonic anhydrase IV	CA4	P22748	CHEMBL3729	Lyase	1		L10	CA4	P22748
guajavarin	L11	NADPH oxidase 4	NOX4	Q9NPH5	CHEMBL1250375	Enzyme	1		L11	NOX4	Q9NPH5
guajavarin	L11	Aldose reductase (by homology)	AKR1B1	P15121	CHEMBL1900	Enzyme	1		L11	AKR1B1	P15121
guajavarin	L11	Xanthine dehydrogenase	XDH	P47989	CHEMBL1929	Oxidoreductase	1		L11	XDH	P47989
guajavarin	L11	Tyrosinase	TYR	P14679	CHEMBL1973	Oxidoreductase	1		L11	TYR	P14679
guajavarin	L11	Tyrosine-protein kinase receptor FLT3	FLT3	P36888	CHEMBL1974	Kinase	1		L11	FLT3	P36888
guajavarin	L11	Carbonic anhydrase II	CA2	P00918	CHEMBL205	Lyase	1		L11	CA2	P00918
guajavarin	L11	Arachidonate 5-lipoxygenase	ALOX5	P09917	CHEMBL215	Oxidoreductase	1		L11	ALOX5	P09917
guajavarin	L11	Carbonic anhydrase VII	CA7	P43166	CHEMBL2326	Lyase	1		L11	CA7	P43166
guajavarin	L11	Estradiol 17-beta-dehydrogenase 2	HSD17B2	P37059	CHEMBL2789	Enzyme	1		L11	HSD17B2	P37059
guajavarin	L11	Multidrug resistance-associated protein 1	ABCC1	P33527	CHEMBL3004	Primary active transporter	1		L11	ABCC1	P33527
guajavarin	L11	Estradiol 17-beta-dehydrogenase 1	HSD17B1	P14061	CHEMBL3181	Enzyme	1		L11	HSD17B1	P14061
guajavarin	L11	Aryl hydrocarbon receptor	AHR	P35869	CHEMBL3201	Transcription factor	1		L11	AHR	P35869
guajavarin	L11	Carbonic anhydrase XII	CA12	O43570	CHEMBL3242	Lyase	1		L11	CA12	O43570
guajavarin	L11	Estrogen-related receptor alpha	ESRRA	P11474	CHEMBL3429	Nuclear receptor	1		L11	ESRRA	P11474
guajavarin	L11	P-glycoprotein 1	ABCB1	P08183	CHEMBL4302	Primary active transporter	1		L11	ABCB1	P08183
guajavarin	L11	Cytochrome P450 1B1	CYP1B1	Q16678	CHEMBL4878	Cytochrome P450	1		L11	CYP1B1	Q16678
guajavarin	L11	ATP-binding cassette sub-family G member 2	ABCG2	Q9UNQ0	CHEMBL5393	Primary active transporter	1		L11	ABCG2	Q9UNQ0
kaempferol	L17	NADPH oxidase 4	NOX4	Q9NPH5	CHEMBL1250375	Enzyme	1		L17	NOX4	Q9NPH5
kaempferol	L17	Vasopressin V2 receptor	AVPR2	P30518	CHEMBL1790	Family A G protein-coupled receptor	1		L17	AVPR2	P30518
kaempferol	L17	Aldose reductase	AKR1B1	P15121	CHEMBL1900	Enzyme	1		L17	AKR1B1	P15121
kaempferol	L17	Xanthine dehydrogenase	XDH	P47989	CHEMBL1929	Oxidoreductase	1		L17	XDH	P47989
kaempferol	L17	Monoamine oxidase A	MAOA	P21397	CHEMBL1951	Oxidoreductase	1		L17	MAOA	P21397
kaempferol	L17	Insulin-like growth factor I receptor	IGF1R	P08069	CHEMBL1957	Kinase	1		L17	IGF1R	P08069
kaempferol	L17	Tyrosine-protein kinase receptor FLT3	FLT3	P36888	CHEMBL1974	Kinase	1		L17	FLT3	P36888
kaempferol	L17	Cytochrome P450 19A1	CYP19A1	P11511	CHEMBL1978	Cytochrome P450	1		L17	CYP19A1	P11511
kaempferol	L17	Epidermal growth factor receptor erbB1	EGFR	P00533	CHEMBL203	Kinase	1		L17	EGFR	P00533
kaempferol	L17	Thrombin	F2	P00734	CHEMBL204	Protease	1		L17	F2	P00734
kaempferol	L17	Carbonic anhydrase II	CA2	P00918	CHEMBL205	Lyase	1		L17	CA2	P00918
kaempferol	L17	Serine/threonine-protein kinase PIM1	PIM1	P11309	CHEMBL2147	Kinase	1		L17	PIM1	P11309
kaempferol	L17	Arachidonate 5-lipoxygenase	ALOX5	P09917	CHEMBL215	Oxidoreductase	1		L17	ALOX5	P09917
kaempferol	L17	Serine/threonine-protein kinase Aurora-B	AURKB	Q96GD4	CHEMBL2185	Kinase	1		L17	AURKB	Q96GD4
kaempferol	L17	Dopamine D4 receptor	DRD4	P21917	CHEMBL219	Family A G protein-coupled receptor	1		L17	DRD4	P21917
kaempferol	L17	Adenosine A1 receptor (by homology)	ADORA1	P30542	CHEMBL226	Family A G protein-coupled receptor	1		L17	ADORA1	P30542
kaempferol	L17	Carbonic anhydrase VII	CA7	P43166	CHEMBL2326	Lyase	1		L17	CA7	P43166
kaempferol	L17	Glyoxalase I	GLO1	Q04760	CHEMBL2424	Enzyme	1		L17	GLO1	Q04760
kaempferol	L17	Myeloperoxidase	MPO	P05164	CHEMBL2439	Enzyme	1		L17	MPO	P05164
kaempferol	L17	PI3-kinase p85-alpha subunit	PIK3R1	P27986	CHEMBL2506	Enzyme	1		L17	PIK3R1	P27986
kaempferol	L17	Adenosine A2a receptor (by homology)	ADORA2A	P29274	CHEMBL251	Family A G protein-coupled receptor	1		L17	ADORA2A	P29274
kaempferol	L17	Death-associated protein kinase 1	DAPK1	P53355	CHEMBL2558	Kinase	1		L17	DAPK1	P53355
kaempferol	L17	Liver glycogen phosphorylase	PYGL	P06737	CHEMBL2568	Enzyme	1		L17	PYGL	P06737
kaempferol	L17	Carbonic anhydrase I	CA1	P00915	CHEMBL261	Lyase	1		L17	CA1	P00915
kaempferol	L17	Glycogen synthase kinase-3 beta	GSK3B	P49841	CHEMBL262	Kinase	1		L17	GSK3B	P49841
kaempferol	L17	Tyrosine-protein kinase SRC	SRC	P12931	CHEMBL267	Kinase	1		L17	SRC	P12931
kaempferol	L17	Focal adhesion kinase 1	PTK2	Q05397	CHEMBL2695	Kinase	1		L17	PTK2	Q05397
kaempferol	L17	Estradiol 17-beta-dehydrogenase 2	HSD17B2	P37059	CHEMBL2789	Enzyme	1		L17	HSD17B2	P37059
kaempferol	L17	Vascular endothelial growth factor receptor 2	KDR	P35968	CHEMBL279	Kinase	1		L17	KDR	P35968
kaempferol	L17	Matrix metalloproteinase 13	MMP13	P45452	CHEMBL280	Protease	1		L17	MMP13	P45452
kaempferol	L17	Matrix metalloproteinase 3	MMP3	P08254	CHEMBL283	Protease	1		L17	MMP3	P08254
kaempferol	L17	Carbonic anhydrase III	CA3	P07451	CHEMBL2885	Lyase	1		L17	CA3	P07451
kaempferol	L17	Arachidonate 15-lipoxygenase	ALOX15	P16050	CHEMBL2903	Enzyme	1		L17	ALOX15	P16050
kaempferol	L17	Multidrug resistance-associated protein 1	ABCC1	P33527	CHEMBL3004	Primary active transporter	1		L17	ABCC1	P33527
kaempferol	L17	Serine/threonine-protein kinase PLK1	PLK1	P53350	CHEMBL3024	Kinase	1		L17	PLK1	P53350
kaempferol	L17	Carbonic anhydrase VI	CA6	P23280	CHEMBL3025	Lyase	1		L17	CA6	P23280
kaempferol	L17	Cyclin-dependent kinase 1	CDK1	P06493	CHEMBL308	Kinase	1		L17	CDK1	P06493
kaempferol	L17	Matrix metalloproteinase 9	MMP9	P14780	CHEMBL321	Protease	1		L17	MMP9	P14780
kaempferol	L17	Carbonic anhydrase XII	CA12	O43570	CHEMBL3242	Lyase	1		L17	CA12	O43570
kaempferol	L17	Matrix metalloproteinase 2	MMP2	P08253	CHEMBL333	Protease	1		L17	MMP2	P08253
kaempferol	L17	Protein kinase N1	PKN1	Q16512	CHEMBL3384	Kinase	1		L17	PKN1	Q16512
kaempferol	L17	Carbonic anhydrase XIV	CA14	Q9ULX7	CHEMBL3510	Lyase	1		L17	CA14	Q9ULX7
kaempferol	L17	Carbonic anhydrase IX	CA9	Q16790	CHEMBL3594	Lyase	1		L17	CA9	Q16790
kaempferol	L17	Casein kinase II alpha	CSNK2A1	P68400	CHEMBL3629	Kinase	1		L17	CSNK2A1	P68400
kaempferol	L17	Arachidonate 12-lipoxygenase	ALOX12	P18054	CHEMBL3687	Enzyme	1		L17	ALOX12	P18054
kaempferol	L17	Hepatocyte growth factor receptor	MET	P08581	CHEMBL3717	Kinase	1		L17	MET	P08581
kaempferol	L17	Carbonic anhydrase IV	CA4	P22748	CHEMBL3729	Lyase	1		L17	CA4	P22748
kaempferol	L17	Serine/threonine-protein kinase NEK2	NEK2	P51955	CHEMBL3835	Kinase	1		L17	NEK2	P51955
kaempferol	L17	Interleukin-8 receptor A	CXCR1	P25024	CHEMBL4029	Family A G protein-coupled receptor	1		L17	CXCR1	P25024
kaempferol	L17	CaM kinase II beta	CAMK2B	Q13554	CHEMBL4121	Kinase	1		L17	CAMK2B	Q13554
kaempferol	L17	ALK tyrosine kinase receptor	ALK	Q9UM73	CHEMBL4247	Kinase	1		L17	ALK	Q9UM73
kaempferol	L17	Serine/threonine-protein kinase AKT	AKT1	P31749	CHEMBL4282	Kinase	1		L17	AKT1	P31749
kaempferol	L17	P-glycoprotein 1	ABCB1	P08183	CHEMBL4302	Primary active transporter	1		L17	ABCB1	P08183
kaempferol	L17	Serine/threonine-protein kinase NEK6	NEK6	Q9HC98	CHEMBL4309	Kinase	1		L17	NEK6	Q9HC98
kaempferol	L17	Phospholipase A2 group 1B	PLA2G1B	P04054	CHEMBL4426	Enzyme	1		L17	PLA2G1B	P04054
kaempferol	L17	Carbonic anhydrase VA	CA5A	P35218	CHEMBL4789	Lyase	1		L17	CA5A	P35218
kaempferol	L17	Beta-secretase 1	BACE1	P56817	CHEMBL4822	Protease	1		L17	BACE1	P56817
kaempferol	L17	Cytochrome P450 1B1	CYP1B1	Q16678	CHEMBL4878	Cytochrome P450	1		L17	CYP1B1	Q16678
kaempferol	L17	Tyrosine-protein kinase receptor UFO	AXL	P30530	CHEMBL4895	Kinase	1		L17	AXL	P30530
kaempferol	L17	ATP-binding cassette sub-family G member 2	ABCG2	Q9UNQ0	CHEMBL5393	Primary active transporter	1		L17	ABCG2	Q9UNQ0
kaempferol	L17	NUAK family SNF1-like kinase 1	NUAK1	O60285	CHEMBL5784	Kinase	1		L17	NUAK1	O60285
kaempferol	L17	Aldo-keto reductase family 1 member C2 (by homology)	AKR1C2	P52895	CHEMBL5847	Enzyme	1		L17	AKR1C2	P52895
kaempferol	L17	Aldo-keto reductase family 1 member C1 (by homology)	AKR1C1	Q04828	CHEMBL5905	Enzyme	1		L17	AKR1C1	Q04828
kaempferol	L17	Aldo-keto-reductase family 1 member C3 (by homology)	AKR1C3	P42330	CHEMBL4681	Enzyme	1		L17	AKR1C3	P42330
kaempferol	L17	Aldo-keto reductase family 1 member C4 (by homology)	AKR1C4	P17516	CHEMBL4999	Enzyme	1		L17	AKR1C4	P17516
kaempferol	L17	Carbonic anhydrase XIII (by homology)	CA13	Q8N1Q1	CHEMBL3912	Lyase	1		L17	CA13	Q8N1Q1
kaempferol	L17	Aldehyde reductase (by homology)	AKR1A1	P14550	CHEMBL2246	Enzyme	1		L17	AKR1A1	P14550
kaempferol	L17	G-protein coupled receptor 35	GPR35	Q9HC97	CHEMBL1293267	Family A G protein-coupled receptor	1		L17	GPR35	Q9HC97

## Sheet: OA靶点
A2MR
AAT5
ACLP
ADAMTS11
AGC1
ALK5
ANK
AOEB166
ARMD7
ARVD1
BCC7
BCYM3
BDA1
BDA1C
BDPLT11
BHD
BMFS5
BPAG1
C17
C19orf10
C2TA
C4orf20
C4ST1
CACP
CAD11
CADASIL2
CAFYD
CARASIL
CBAS3
CCAL2
CDG1WAD
CDG1WAR
CDMP1
CHTD8
CLC7
CLG3
CMDJ
CMT2C
CPPDD
CPVT4
CSBS
CSIF
CSPG1
CTLA8
CTS2
CVD1
D5S1708
D6S1101
DASS
DBQD1
DDH3
DEE106
DFNA13
DFNA37
DFNB53
DHTR
DIVA
DMH
DTD
DTDST
DUPANS
DVWA
EBS3
ECYT4
EDG2
EDM1
EDM2
EDM3
EDM4
EDM5
EDM6
EDM7
EDSARTH1
EDSARTH2
EDSCL1
EDSCV
EDSPD1
EDSPD2
EIG8
ESR
ESTRR
ESWS
FABL
FBCG2
FGS2
FIH
FLN1
FMD
FMDMF
FMF
FN
FNZ
FPN1
FRZB1
GALBP
GFND2
GOA1
GPHYSD3
GPIV
GVHDS
HANK
HAPO
HFE4
HHC1
HIF2A
HMSN2C
HOA
HOD
HPDR1
HSAN2D
HSAN6
HYP
HYPOC1
HYSP1
IDD
IDDECA
IL17
IL25
IMD4
IMD63
IREG1
ITM1
JV18
KD
KIAA1016
KIAA1441
KIAA1524
KID
KNSL4
KPA
LDC
LDS1
LDS3
LDS5
LDS6
LEPD
LETS
LFS1
LINC01156
LOC344875
LPA1
LQT14
LTBP2
LXHR
LYP
MAC2
MADH2
MADH3
MANDP1
MCAF
MCP1
MDST
MED
MEF
MEKK2
MHC2TA
MNS
MOP2
MPS9
MSF
MSK16
MSSE
NAIL
NENA
NHBP
NISBD1
NK4
NKR2B4
OB
OBP
OCBMD
OCTN1
ODG8
OI1
OI2
OI3
OI4
OPD1
OPD2
OPTA2
OPTB4
OS1
OS2
OS3
OS5
OSMEDA
OSMEDB
P53
p90
PAAND
PCAR1
PDB6
PEP
PHKD
PLAP1
PLC
PN1
PPAC
PPRD
PRSS11
PSACH
PTPN8
RNHF
SBMA
SCAN1
SCIDX
SCIDX1
SCYA2
SDF1
SEDK
SEDL
SEDT
SEMDBCD
SEMDDR
SEMDJL2
SF20
SFNP
SIMA135
SJA
SJS
SJS1
SLAMF4
SLC11A3
SMAL
SMAX1
SMDCF
SPG5A
SPSMA
SRFP3
SSOAOD
SSQTL1
STL2
STL4
STL5
STL6
SYM1B
SYNS2
SZP
TACE
TBHS2
TFM
TIG2
TMC
TP120
VLA1
VROAC
VZG1
WISP3
WND
5MWI_A-023
5MWI_A-026
AAGAB
AAR2
AB372731
ABCB1
ABCB11
ABCB9
ABCC1
ABCC9
ABCD2
ABHD14B
ABT1
ACAN
ACE
ACER3
ACHE
ACP5
ACSF3
ACSL4
ACTA1
ACTA2
ACTA2-AS1
ACTG1
ACTMAP
ACVR1
ACVRL1
ACYP1
ADA
ADAM10
ADAM12
ADAM15
ADAM17
ADAMTS1
ADAMTS12
ADAMTS14
ADAMTS15
ADAMTS2
ADAMTS20
ADAMTS3
ADAMTS4
ADAMTS5
ADAMTS7
ADAMTS8
ADAMTS9
ADAMTSL1
ADAMTSL4
ADAMTSL4-AS2
ADCYAP1
ADIPOQ
ADIPOR1
ADIPOR2
ADM
ADPRH
ADRB2
AEBP1
AFG3L1P
AGER
AGO4
AGPAT4
AGTR1
AHR
AHSG
AIM2
AIP
AKNA
AKR1B10
AKR1C1
AKR1C2
AKR1C4
AKT1
AKT3
ALB
ALDH1A2
ALDH1L1-AS2
ALK
ALKBH5
ALMS1
ALOX15
ALOX5
ALOX5AP
ALPL
ALPP
ALX3
AMACR
ANG
ANGPT1
ANGPT2
ANGPT4
ANGPTL2
ANK1
ANK2
ANK3
ANKH
ANKRD11
ANKRD27
ANKRD55
ANKS1A
ANP32A
ANPEP
ANXA1
ANXA2R-OT1
ANXA3
ANXA5
ANXA6
AP3B1
AP3D1
AP4B1-AS1
APLN
APOA1
APOB
APOBEC4
APOD
APOE
APOH
APOL1
APP
AQP1
AQP9
AR
ARHGAP29-AS1
ARID1B
ARID3B
ARSA
ARSB
ARX
ASAH1
ASB8
ASCC1
ASIC1
ASIC2
ASPN
ASTN2
ASTN2-AS1
ATF2
ATF3
ATF6
ATG2A
ATG2B
ATG7
ATP13A2
ATP2B1
ATP2B1-AS1
ATP4A
ATP5MC1P8
ATP6V0A2
ATP6V1FP2
ATP7B
ATPSCKMT
AXL
AZU1
B2M
B3GALT6
B3GAT3
B4GALT1
B4GALT7
B9D2
BAG1
BAG3
BAG6
BANK1
BAX
BBC3
BCAP29
BCHE
BCL2
BCL2L1
BCL2L11
BCL2L12
BCL2L13
BDKRB2
BDNF
BDNF-AS
BECN1
BGLAP
BGN
BHD
BICDL3P
BIRC5
BLK
BLTP3A
BLZF1
BMAL1
BMP1
BMP2
BMP3
BMP4
BMP5
BMP6
BMP7
BMPR1A
BMPR2
BNIP3
BOK
BRCA2
BRD2
BRD4
BRWD1
BRWD1P2
BSG
BST1
BTLA
BTN2A1
BTN2A2
BTN2A3P
BTN3A1
BTN3A2
BTN3A3
BTNL2
BTNL8
C12orf60
C17orf67
C1orf220
C1orf56
C1QBP
C1QTNF12
C1QTNF9B
C1R
C1S
C3
C3orf70
C5
C5AR1
CA10
CA2
CA3
CABIN1
CACNA1F
CACNA1G
CALCA
CALCR
CALM1
CALM2
CAMK2A
CAMK2B
CAMKV
CAMP
CANT1
CANX
CAPN1-AS1
CAPN2
CARD16
CASC15
CASC2
CASP1
CASP3
CASP8
CASR
CAST
CASZ1
CAT
CAV1
CAVIN2
CBS
CBX3
CBX4
CC2D2B
CCAL1
CCAR2
CCDC134
CCDC184
CCDC26
CCDC33
CCDC82
CCDC91
CCDC97
CCK
CCL1
CCL11
CCL13
CCL14
CCL15
CCL15-CCL14
CCL16
CCL18
CCL19
CCL2
CCL20
CCL21
CCL22
CCL3
CCL4
CCL5
CCL7
CCL8
CCN1
CCN2
CCN3
CCN4
CCN6
CCND1
CCND2
CCNT1
CCR1
CCR2
CCR3
CCR4
CCR5
CCR5AS
CCR6
CCR7
CCR9
CCRL2
CD14
CD151
CD160
CD163
CD244
CD247
CD34
CD36
CD38
CD3D
CD4
CD40
CD40LG
CD44
CD47
CD55
CD6
CD68
CD79A
CD80
CD86
CD8A
CDC26
CDC42EP2
CDC5L
CDC7
CDCP1
CDH11
CDH2
CDK10
CDK14
CDK2AP1
CDK5RAP3
CDKN1A
CDKN2A
CDKN2B-AS1
CDR1-AS
CEACAM16
CEACAM21
CEACAM3
CEACAM4
CEACAM8
CEBPB
CEMIP
CENPP
CEP250
CERNA3
CFAP54
CFI
CFL1
CFLAR
CFTR
CH25H
CHAD
CHADL
CHD9
CHI3L1
CHI3L2
CHIA
CHIT1
CHKA
CHKB-CPT1B
CHRD
CHRDL2
CHRFAM7A
CHRNG
CHST11
CHST14
CHST3
CHUK
CIITA
CILP
CILP2
CINP
CIP2A
CIRBP
CKLF
CKM
CLCN5
CLCN7
CLCNKA
CLDN23
CLEC18A
CLEC3B
CLEC4A
CLK3
CLN3
CLU
CM034951-108
CM034955-345
CM034958-377
CM034958-378
CM034959-017
CM034959-238
CM034962-144
CM034965-181
CMKLR1
CNBD2
CNN1
CNR1
CNR2
COG4
COG5
COL10A1
COL11A1
COL11A2
COL12A1
COL18A1
COL1A1
COL1A2
COL20A1
COL27A1
COL2A1
COL3A1
COL4A1
COL4A5
COL5A1
COL5A2
COL6A1
COL6A3
COL6A4P1
COL6A4P2
COL9A1
COL9A2
COL9A3
COLGALT1
COLGALT2
COMMD4
COMP
COMT
CORT
COX5A
CP
CPEB1
CPLX3
CPNE1
CPSF6
CPT2
CR1
CRADD
CRADD-AS1
CRB3
CREB1
CREB3
CREB3L1
CRELD2
CRH
CRIPTO
CRLF1
CRMA
CRP
CRTAC1
CRTAP
CRTC1
CRY1
CRY2
CRYAB
CS
CSF1
CSF1R
CSF2
CSF2RA
CSF3
CSGALNACT1
CSK
CSMD1
CSNK1E
CSNK2A1
CSPG4
CST3
CSTA
CTBP1-DT
CTLA4
CTNNB1
CTSA
CTSB
CTSD
CTSG
CTSK
CTSL
CTSS
CUX1
CX3CL1
CX3CR1
CXADR
CXCL1
CXCL10
CXCL11
CXCL12
CXCL13
CXCL16
CXCL5
CXCL6
CXCL8
CXCL9
CXCR1
CXCR2
CXCR3
CXCR4
CXCR5
CXCR6
CYBA
CYCS
CYP11A1
CYP19A1
CYP1A1
CYP1A2
CYP1B1
CYP20A1
CYP26B1
CYP27B1
CYP2A13
CYP2A6
CYP2B6
CYP2C18
CYP2C19
CYP2C8
CYP2C9
CYP2D6
CYP2E1
CYP3A4
CYP3A5
CYP3A7
CYP7B1
CYTL1
CYTOR
DAGLB
DANCR
DBH
DCAF12
DCDC1
DCHS1
DCN
DCP1A
DCSTAMP
DDH1
DDH2
DDHD1
DDIT3
DDIT4
DDR1
DDR2
DDRGK1
DDX20
DDX23
DDX55
DEAF1
DEF6
DEFB103B
DEFB4A
DELEC1
DEPP1
DERL1
DERL2
DGCR5
DGCR8
DGKI
DIO2
DIO3
DKK1
DKK3
DLGAP1-AS2
DLL1
DLX3
DLX5
DMP1
DNAH10
DNAH8
DNAI2
DNAJB6
DNAJC22
DNM1P34
DNM3OS
DNMT1
DNMT3A
DNMT3B
DNTT
DOT1L
DPEP1
DPH1
DPP4
DPP7
DRD2
DSE
DSP
DSPP
DST
DSTN
DUS4L
DUSP1
DUSP19
DUSP5
DVL2
DYM
DYNC1I1
E2F1
ECM1
ECM1P2
ECRG4
EDA
EDC3
EDEM2
EDEM3
EDN1
EDNRA
EEIG1
EFEMP1
EFEMP2
EFNB2
EGF
EGFR
EGR1
EHBP1L1
EHHADH-AS1
EIF1AD
EIF1B-AS1
EIF2B1
EIF4G2
EIF6
ELANE
ELDR
ELF3
ELN
ELOF1
EMILIN1
EMSLR
EMSY
EN1
ENG
ENO1
ENO2
ENPP1
ENSG00000197376
ENSG00000205537
ENSG00000207009
ENSG00000219682
ENSG00000227098
ENSG00000228352
ENSG00000231760
ENSG00000236457
ENSG00000236838
ENSG00000237174
ENSG00000238156
ENSG00000243696
ENSG00000248634
ENSG00000253926
ENSG00000254461
ENSG00000254632
ENSG00000255038
ENSG00000255310
ENSG00000255730
ENSG00000257042
ENSG00000257194
ENSG00000257955
ENSG00000257985
ENSG00000258216
ENSG00000258365
ENSG00000260103
ENSG00000260274
ENSG00000260773
ENSG00000260947
ENSG00000261118
ENSG00000261384
ENSG00000261578
ENSG00000262810
ENSG00000268218
ENSG00000269514
ENSG00000269971
ENSG00000271547
ENSG00000275431
ENSG00000277310
ENSG00000279093
ENSG00000280309
ENSG00000280333
ENSG00000280904
ENSG00000285108
ENSG00000286417
ENSG00000286696
ENSG00000288703
ENSG00000289715
ENSG00000291336
EP300
EPAS1
EPCAM
EPHB4
EPYC
EQTN
ERAP1
ERAP2
ERCC4
ERCC6L2-AS1
ERG
ERGIC3
ERI1
ERP27
ERV3-1
ERVK-18
ESD
ESR1
ESR2
ESRRA
ESRRB
ETS1
ETS2
EXT1
EXT2
EXTL2
EYA1
EZH2
F2
F2RL1
F2RL3
F3
F8
F9
FAAH
FAAP24
FABP2
FABP4
FAH
FALEC
FAM111B
FAM136A
FAM20B
FAM20C
FAM225A
FAM53A
FAM83C
FAM83C-AS1
FAM86B3P
FAM98A
FANCA
FANCE
FAP
FAS
FASLG
FAUP4
FBLN1
FBLN2
FBLN5
FBN1
FBN2
FBP1
FBXL19-AS1
FBXO21
FBXW7
FCGR1A
FCGR2B
FER1L4
FFAR4
FGD5-AS1
FGF1
FGF10
FGF18
FGF2
FGF21
FGF23
FGF3
FGF7
FGF8
FGF9
FGFR1
FGFR2
FGFR3
FHIT
FILIP1
FIP1L1
FIS1
FJ601676
FJ601684-132
FKBP10
FKBP14
FKBP14-AS1
FKBP5
FLJ42393
FLNA
FLT1
FLT3LG
FMOD
FMR1
FN1
FNDC5
FOLR2
FOS
FOSL1
FOXC1
FOXD1
FOXD2-AS1
FOXM1
FOXO1
FOXO3
FOXP2
FOXP3
FOXP4
FPR2
FRMD8
FRMPD1
FRZB
FSTL1
FTO
FTO-IT1
FURIN
FUT1
FUT4
FYCO1
FZD8
GAL
GALC
GALE
GALNS
GALNT15
GANAB
GAPDH
GAS5
GAS6
GBA1
GBA2
GC
GDF5
GDF5-AS1
GDNF
GEM
GFM1
GGT1
GGT7
GH1
GHR
GHRH
GHRHR
GHRL
GJA1
GLA
GLB1
GLIS3
GLIS3-AS2
GLO1
GLP1R
GLRA1
GLRX
GLT8D1
GLUL
GML
GNAS
GNAS-AS1
GNL3
GNPTAB
GNS
GOLGB1
GORAB
GP1BA
GP6
GPC3
GPD1L
GPI
GPM6A
GPNMB
GPR101
GPR143
GPR22
GPR33
GPT
GPX3
GRASLND
GREM1
GRIN2B
GRINA
GRN
GSDMC
GSK3B
GSR
GSTM1
GSTP1
GSTT1
GUCY2EP
GUSB
GUSBP2
GZMA
GZMB
H1-2
H1-3
H1-4
H1-7
H19
H2AC5P
H2AC6
H2BC4
H2BC9
H3-3B
H3-7
H3C1
H3C12
H3C13
H3C14
H3C3
H3P27
H4C16
HABP2
HABP4
HAPLN1
HAPLN3
HAS1
HAS2
HAS2-AS1
HAVCR2
HBB
HBEGF
HBP1
HCCAT5
HCFC1
HCG11
HCG18
HDAC1
HDAC2
HDAC4
HDAC7
HDAC9
HELLPAR
HES1
HES5
HEXB
HEXD
HFE
HFE-AS1
HGD
HGF
HGFAC
HHIP
HIC1
HIF1A
HIF3A
HIVEP2-DT
HK2
HLA-A
HLA-B
HLA-DMA
HLA-DPA1
HLA-DPB1
HLA-DQA1
HLA-DQA2
HLA-DQB1
HLA-DRB1
HLA-G
HMGA2
HMGB1
HMGB2
HMGCR
HMGN4
HMMR
HMOX1
HNF1A-AS1
HNRNPA1P16
HNRNPUL1
HORMAD1
HOTAIR
HOTAIRM1
HOTTIP
HOXA1
HOXA-AS3
HOXD11
HP
HPD
HPGD
HPSE
HPX
HRH2
HRH4
HS6ST2
HSALNG0007046
HSALNG0010680
HSALNG0015811
HSALNG0015815
HSALNG0015906
HSALNG0017617
HSALNG0020226-451
HSALNG0020226-469
HSALNG0025653
HSALNG0025655
HSALNG0026174
HSALNG0031532
HSALNG0031533
HSALNG0046567
HSALNG0048733
HSALNG0050293
HSALNG0050296
HSALNG0050313
HSALNG0050314
HSALNG0054882
HSALNG0059707
HSALNG0061637
HSALNG0063403
HSALNG0069708
HSALNG0069709
HSALNG0073878
HSALNG0078751
HSALNG0090817
HSALNG0092957
HSALNG0092966
HSALNG0093138
HSALNG0094715
HSALNG0094803
HSALNG0111532
HSALNG0113871
HSALNG0115820
HSALNG0123949
HSALNG0126180
HSALNG0142420
HSALNG0143222
HSALNG0144148
HSALNG0145747
HSALNG0145935
HSALNG0148026
HSALNG0149108
HSD11B1
HSH2D
HSP90B1
HSPA4
HSPA5
HSPA8
HSPD1
HSPG2
HTR2A
HTRA1
HULC
HYAL1
HYAL2
IBSP
ICA1L
ICAM1
ICAM3
IDS
IDUA
IFITM5
IFNB1
IFNG
IFNL1
IFRD1
IGF1
IGF1R
IGF2
IGF2BP3
IGFALS
IGFBP1
IGFBP2
IGFBP3
IGFBP5
IGFBP7
IHH
IKBKB
IKBKE
IL10
IL10RA
IL11
IL12A
IL13
IL15
IL15RA
IL16
IL17A
IL17B
IL17F
IL17RA
IL17RC
IL18
IL18BP
IL18R1
IL18RAP
IL1A
IL1B
IL1F10
IL1R1
IL1R2
IL1RAP
IL1RAPL2
IL1RL1
IL1RL2
IL1RN
IL2
IL21
IL21R
IL22
IL22RA1
IL23A
IL23R
IL24
IL26
IL27
IL2RA
IL2RB
IL2RG
IL3
IL32
IL33
IL34
IL36A
IL37
IL4
IL4R
IL5
IL6
IL6R
IL6ST
IL7
IL7R
IL9
ILF3
ILF3-DT
ILRUN
ILRUN-AS1
IMPG2
INHBA
INS
IPO8
IQCH
IQCH-AS1
IRAK3
IRF1
IRF2BPL
IRF5
IRX2-DT
IRX3
ISG20
ISLR
ISLR2
ISOC1
ITCH
ITGA1
ITGA4
ITGA5
ITGAL
ITGAM
ITGAV
ITGB1
ITGB2
ITGB3
ITGB5
ITIH1
ITIH4
ITLN1
JAG1
JAM3
JRKL
JUN
JUNB
JUND
KANSL2
KAT5
KAZALD1
KBTBD13
KCNJ11
KCNJ5
KCNK15-AS1
KCNK7
KCNMA1
KCNQ1OT1
KCNQ2
KCNQ3
KCTD13
KDELR2
KDM1A
KDM4B
KDM6B
KDR
KEAP1
KHDRBS1
KIF12
KIF21A
KIF21B
KIF22
KIF24
KIR2DS4
KIT
KL
KLC2-AS1
KLF2
KLF3-AS1
KLF4
KLF5
KLF9
KLK11
KLRB1
KMT2D
KNG1
KNTC1
KPNA2
L13304-005
L13304-010
L13304-025
L13715-004
L13715-018
L3MBTL2
LACC1
LAG3
LAMA5
LAMP1
LAMP2
LAMP3
LAYN
LCN2
LDHB
LECT2
LEF1
LEMD1-AS1
LEP
LEPQTL1
LEPR
LETR1
LGALS1
LGALS3
LGALS3BP
LGALS4
LGALS8
LGALS9
LGR4
LGR5
LIF
LINC00092
LINC00114
LINC00265
LINC00293
LINC00310
LINC00313
LINC00473
LINC00511
LINC00623
LINC00654
LINC00662
LINC00665
LINC00680
LINC00707
LINC00958
LINC00976
LINC00977
LINC01060
LINC01094
LINC01154
LINC01191
LINC01242
LINC01370
LINC01411
LINC01554
LINC01614
LINC01672
LINC01695
LINC01783
LINC01793
LINC01865
LINC01874
LINC01875
LINC02009
LINC02154
LINC02210
LINC02328
LINC02399
LINC02458
LINC02596
LINC02605
LINC02742
LINC02758
LINC02888
LINC02980
LINC03126
LINC-ROR
LIPA
LMNA
LMNB1
LMX1B
lnc-ADAMTSL4-1
lnc-ADD2-2
lnc-APOBEC4-5
lnc-C2orf40-9
lnc-C6orf106-2
lnc-CCDC33-6
lnc-CDK2AP1-1
lnc-CMKLR1-3
lnc-COLGALT2-1
lnc-COLGALT2-6
lnc-CTDSP2-7
lnc-FAM83C-2
lnc-GLIS3-2
lnc-GORASP1-1
lnc-HFM1-3
lnc-IQCH-7
lnc-KCNK7-4
lnc-KIF12-2
lnc-KIF12-3
lnc-KLHL42-2
lnc-LYPLAL1-11
lnc-LYPLAL1-9
lnc-MANBA-4
lnc-MCL1-8
lnc-MDFIC-7
lnc-NEK4-1
LNCRNA-ATB
lnc-RTN4RL1-1
lnc-SOCS2-6
lnc-SSSCA1-1
lnc-TACC3-2
lnc-TACC3-3
lnc-TIMM29-1
lnc-TMEM106C-4
lnc-UBL7-2
lnc-ZNF618-2
LOC100130744
LOC101448202
LOC101927839
LOC101928540
LOC101929268
LOC101929770
LOC102723692
LOC105369750
LOC105369787
LOC105369890
LOC105376225
LOC105379168
LOC106050102
LOC106627981
LOC106728418
LOC107985895
LOC109461476
LOC110283621
LOC111365141
LOC112543491
LOC124900223
LOC124900366
LOC124900379
LOC124900668
LOC124901701
LOC124902255
LOC124902823
LOC124902927
LOC124903077
LOC124903525
LOC124903691
LOC124904657
LOC126806446
LOC126861318
LOC126862124
LOC126862264
LOC126862586
LOC129930561
LOC129936436
LOC129999735
LOC130009838
LOC130057352
LOC130059892
LOC130061867
LOC130068781
LOC157273
LOC654780
LONP1
LOX
LOXL1-AS1
LOXL2
LOXL3
LPA
LPAR1
LPCAT3
LPL
LRCH1
LRG1
LRIG3
LRP1
LRP2
LRP5
LRP6
LRRC15
LRRC37A4P
LRRK2
LSP1P3
LTA
LTBP1
LTBP2
LTBP3
LTBR
LTF
LUM
LURAP1L-AS1
LVRN
LXN
LY96
LYPLAL1
LYPLAL1-AS1
LYRM4-AS1
LYVE1
LZTFL1
MAD2L1-DT
MAF
MAFB
MALAT1
MALT1
MAML2
MAN2B1
MAN2C1
MANSC4
MAOA
MAP1LC3A
MAP2K1
MAP2K4
MAP2K6
MAP2K7
MAP3K11
MAP3K2
MAP3K4
MAP3K5
MAP3K7
MAP3K8
MAP3K9
MAP7
MAPK1
MAPK10
MAPK14
MAPK3
MAPK8
MAPT
MATN1
MATN3
MATN4
MAZ
MBTPS2
MC1R
MCAM
MCF2L
MCM3AP-AS1
MCOLN1
MDFIC
MDS2
ME2P1
MECP2
MEFV
MEG3
MEGF9
MELK
MELTF-AS1
MEN1
MEPE
MESD
MET
METRNL
METTL15
METTL16
METTL3
MFAP4
MFGE8
MFN2
MG828730-051
MGAM
MGP
MIA3
MIAT
MICA
MICAL3
MID1
MIF
MIR101-1
MIR103A2
MIR105-1
MIR106A
MIR107
MIR10B
MIR1179
MIR1183
MIR1197
MIR1202
MIR1207
MIR122
MIR1225
MIR1227
MIR1236
MIR1238
MIR124-1
MIR124-3
MIR1246
MIR1248
MIR125A
MIR125B1
MIR125B2
MIR126
MIR1260A
MIR1260B
MIR1262
MIR1265
MIR127
MIR1275
MIR1277
MIR128-1
MIR128-2
MIR1289-1
MIR129-1
MIR129-2
MIR1299
MIR130A
MIR130B
MIR132
MIR1323
MIR133B
MIR135A1
MIR136
MIR137
MIR138-1
MIR138-2
MIR139
MIR140
MIR141
MIR142
MIR144
MIR145
MIR146A
MIR146B
MIR147B
MIR148A
MIR149
MIR150
MIR151A
MIR151B
MIR152
MIR153-1
MIR155
MIR15A
MIR16-1
MIR16-2
MIR17
MIR17HG
MIR181A1
MIR181A2
MIR181B1
MIR181C
MIR182
MIR183
MIR184
MIR185
MIR186
MIR18A
MIR190A
MIR193A
MIR193B
MIR195
MIR196A2
MIR197
MIR199A1
MIR199A2
MIR199B
MIR19A
MIR19B1
MIR200A
MIR200B
MIR200CHG
MIR203A
MIR204
MIR206
MIR208B
MIR20A
MIR20B
MIR21
MIR210
MIR211
MIR214
MIR215
MIR216A
MIR217
MIR22
MIR221
MIR222
MIR223
MIR224
MIR22HG
MIR2355
MIR23A
MIR23B
MIR24-1
MIR24-2
MIR26A1
MIR26B
MIR27A
MIR27B
MIR296
MIR29A
MIR29B1
MIR29B2
MIR29C
MIR300
MIR301A
MIR3065
MIR30A
MIR30B
MIR30C1
MIR30E
MIR31
MIR3128
MIR3143
MIR3148
MIR31HG
MIR320A
MIR320B2
MIR320C1
MIR320D1
MIR320E
MIR324
MIR328
MIR335
MIR337
MIR338
MIR33A
MIR33B
MIR342
MIR345
MIR346
MIR34A
MIR34C
MIR3605
MIR361
MIR365A
MIR3680-1
MIR3680-2
MIR370
MIR373
MIR374A
MIR374B
MIR375
MIR376A1
MIR376B
MIR377
MIR379
MIR381
MIR3909
MIR3922
MIR3960
MIR410
MIR411
MIR423
MIR424
MIR425
MIR4281
MIR4284
MIR4307
MIR4326
MIR433
MIR4432
MIR4435-2
MIR4435-2HG
MIR4470
MIR4487
MIR4492
MIR4498
MIR449A
MIR4516
MIR451A
MIR454
MIR455
MIR4654
MIR4693
MIR4772
MIR4804
MIR483
MIR485
MIR486-1
MIR488
MIR494
MIR497
MIR498
MIR499A
MIR500B
MIR501
MIR502
MIR505
MIR5194
MIR519B
MIR543
MIR558
MIR5700
MIR577
MIR582
MIR584
MIR590
MIR591
MIR599
MIR6069
MIR615
MIR616
MIR634
MIR641
MIR6515
MIR655
MIR663A
MIR665
MIR671
MIR675
MIR6786
MIR7-3HG
MIR761
MIR8072
MIR8082
MIR885
MIR9-1
MIR9-2
MIR92A1
MIR92A2
MIR92B
MIR9-2HG
MIR93
MIR9-3
MIR940
MIR944
MIR98
MIR99A
MIR99B
MIRLET7A1
MIRLET7A2
MIRLET7A3
MIRLET7B
MIRLET7C
MIRLET7E
MIRLET7F1
MIRLET7F2
MIRLET7G
MITF
MK280269-045
MKRN2OS
MKX
MLXIP
MMP1
MMP10
MMP11
MMP12
MMP13
MMP14
MMP15
MMP16
MMP17
MMP19
MMP2
MMP24
MMP24OS
MMP28
MMP3
MMP7
MMP8
MMP9
MN297987
MN308750
MNT
MNX1
MNX1-AS2
MOB3B
MPHOSPH9
MPI
MPO
MRC1
MRC2
[truncated: 958 more rows]

## Sheet: veen
OA	LYHY	OA|LYHY
A2MR	AKR1B1	ABCB1
AAT5	CA7	ABCC1
ACLP	CA12	AHR
ADAMTS11	CA4	AKR1C1
AGC1	FLT3	AKR1C2
ALK5	HSD17B2	AKR1C4
ANK	HSD17B1	AKT1
AOEB166	ABCG2	ALK
ARMD7	AVPR2	ALOX15
ARVD1	PIM1	ALOX5
BCC7	AURKB	AXL
BCYM3	DRD4	CA2
BDA1	ADORA1	CA3
BDA1C	ADORA2A	CAMK2B
BDPLT11	DAPK1	CSNK2A1
BHD	PYGL	CXCR1
BMFS5	CA1	CYP19A1
BPAG1	PLK1	CYP1B1
C17	CA6	EGFR
C19orf10	CDK1	ESRRA
C2TA	PKN1	F2
C4orf20	CA14	GLO1
C4ST1	CA9	GSK3B
CACP	ALOX12	IGF1R
CAD11	NEK2	KDR
CADASIL2	NEK6	MAOA
CAFYD	CA5A	MET
CARASIL	BACE1	MMP13
CBAS3	NUAK1	MMP2
CCAL2	AKR1C3	MMP3
CDG1WAD	CA13	MMP9
CDG1WAR	AKR1A1	MPO
CDMP1	GPR35	NOX4
CHTD8		PIK3R1
CLC7		PLA2G1B
CLG3		PTK2
CMDJ		SRC
CMT2C		TYR
CPPDD		XDH
CPVT4
CSBS
CSIF
CSPG1
CTLA8
CTS2
CVD1
D5S1708
D6S1101
DASS
DBQD1
DDH3
DEE106
DFNA13
DFNA37
DFNB53
DHTR
DIVA
DMH
DTD
DTDST
DUPANS
DVWA
EBS3
ECYT4
EDG2
EDM1
EDM2
EDM3
EDM4
EDM5
EDM6
EDM7
EDSARTH1
EDSARTH2
EDSCL1
EDSCV
EDSPD1
EDSPD2
EIG8
ESR
ESTRR
ESWS
FABL
FBCG2
FGS2
FIH
FLN1
FMD
FMDMF
FMF
FN
FNZ
FPN1
FRZB1
GALBP
GFND2
GOA1
GPHYSD3
GPIV
GVHDS
HANK
HAPO
HFE4
HHC1
HIF2A
HMSN2C
HOA
HOD
HPDR1
HSAN2D
HSAN6
HYP
HYPOC1
HYSP1
IDD
IDDECA
IL17
IL25
IMD4
IMD63
IREG1
ITM1
JV18
KD
KIAA1016
KIAA1441
KIAA1524
KID
KNSL4
KPA
LDC
LDS1
LDS3
LDS5
LDS6
LEPD
LETS
LFS1
LINC01156
LOC344875
LPA1
LQT14
LTBP2
LXHR
LYP
MAC2
MADH2
MADH3
MANDP1
MCAF
MCP1
MDST
MED
MEF
MEKK2
MHC2TA
MNS
MOP2
MPS9
MSF
MSK16
MSSE
NAIL
NENA
NHBP
NISBD1
NK4
NKR2B4
OB
OBP
OCBMD
OCTN1
ODG8
OI1
OI2
OI3
OI4
OPD1
OPD2
OPTA2
OPTB4
OS1
OS2
OS3
OS5
OSMEDA
OSMEDB
P53
p90
PAAND
PCAR1
PDB6
PEP
PHKD
PLAP1
PLC
PN1
PPAC
PPRD
PRSS11
PSACH
PTPN8
RNHF
SBMA
SCAN1
SCIDX
SCIDX1
SCYA2
SDF1
SEDK
SEDL
SEDT
SEMDBCD
SEMDDR
SEMDJL2
SF20
SFNP
SIMA135
SJA
SJS
SJS1
SLAMF4
SLC11A3
SMAL
SMAX1
SMDCF
SPG5A
SPSMA
SRFP3
SSOAOD
SSQTL1
STL2
STL4
STL5
STL6
SYM1B
SYNS2
SZP
TACE
TBHS2
TFM
TIG2
TMC
TP120
VLA1
VROAC
VZG1
WISP3
WND
5MWI_A-023
5MWI_A-026
AAGAB
AAR2
AB372731
ABCB11
ABCB9
ABCC9
ABCD2
ABHD14B
ABT1
ACAN
ACE
ACER3
ACHE
ACP5
ACSF3
ACSL4
ACTA1
ACTA2
ACTA2-AS1
ACTG1
ACTMAP
ACVR1
ACVRL1
ACYP1
ADA
ADAM10
ADAM12
ADAM15
ADAM17
ADAMTS1
ADAMTS12
ADAMTS14
ADAMTS15
ADAMTS2
ADAMTS20
ADAMTS3
ADAMTS4
ADAMTS5
ADAMTS7
ADAMTS8
ADAMTS9
ADAMTSL1
ADAMTSL4
ADAMTSL4-AS2
ADCYAP1
ADIPOQ
ADIPOR1
ADIPOR2
ADM
ADPRH
ADRB2
AEBP1
AFG3L1P
AGER
AGO4
AGPAT4
AGTR1
AHSG
AIM2
AIP
AKNA
AKR1B10
AKT3
ALB
ALDH1A2
ALDH1L1-AS2
ALKBH5
ALMS1
ALOX5AP
ALPL
ALPP
ALX3
AMACR
ANG
ANGPT1
ANGPT2
ANGPT4
ANGPTL2
ANK1
ANK2
ANK3
ANKH
ANKRD11
ANKRD27
ANKRD55
ANKS1A
ANP32A
ANPEP
ANXA1
ANXA2R-OT1
ANXA3
ANXA5
ANXA6
AP3B1
AP3D1
AP4B1-AS1
APLN
APOA1
APOB
APOBEC4
APOD
APOE
APOH
APOL1
APP
AQP1
AQP9
AR
ARHGAP29-AS1
ARID1B
ARID3B
ARSA
ARSB
ARX
ASAH1
ASB8
ASCC1
ASIC1
ASIC2
ASPN
ASTN2
ASTN2-AS1
ATF2
ATF3
ATF6
ATG2A
ATG2B
ATG7
ATP13A2
ATP2B1
ATP2B1-AS1
ATP4A
ATP5MC1P8
ATP6V0A2
ATP6V1FP2
ATP7B
ATPSCKMT
AZU1
B2M
B3GALT6
B3GAT3
B4GALT1
B4GALT7
B9D2
BAG1
BAG3
BAG6
BANK1
BAX
BBC3
BCAP29
BCHE
BCL2
BCL2L1
BCL2L11
BCL2L12
BCL2L13
BDKRB2
BDNF
BDNF-AS
BECN1
BGLAP
BGN
BICDL3P
BIRC5
BLK
BLTP3A
BLZF1
BMAL1
BMP1
BMP2
BMP3
BMP4
BMP5
BMP6
BMP7
BMPR1A
BMPR2
BNIP3
BOK
BRCA2
BRD2
BRD4
BRWD1
BRWD1P2
BSG
BST1
BTLA
BTN2A1
BTN2A2
BTN2A3P
BTN3A1
BTN3A2
BTN3A3
BTNL2
BTNL8
C12orf60
C17orf67
C1orf220
C1orf56
C1QBP
C1QTNF12
C1QTNF9B
C1R
C1S
C3
C3orf70
C5
C5AR1
CA10
CABIN1
CACNA1F
CACNA1G
CALCA
CALCR
CALM1
CALM2
CAMK2A
CAMKV
CAMP
CANT1
CANX
CAPN1-AS1
CAPN2
CARD16
CASC15
CASC2
CASP1
CASP3
CASP8
CASR
CAST
CASZ1
CAT
CAV1
CAVIN2
CBS
CBX3
CBX4
CC2D2B
CCAL1
CCAR2
CCDC134
CCDC184
CCDC26
CCDC33
CCDC82
CCDC91
CCDC97
CCK
CCL1
CCL11
CCL13
CCL14
CCL15
CCL15-CCL14
CCL16
CCL18
CCL19
CCL2
CCL20
CCL21
CCL22
CCL3
CCL4
CCL5
CCL7
CCL8
CCN1
CCN2
CCN3
CCN4
CCN6
CCND1
CCND2
CCNT1
CCR1
CCR2
CCR3
CCR4
CCR5
CCR5AS
CCR6
CCR7
CCR9
CCRL2
CD14
CD151
CD160
CD163
CD244
CD247
CD34
CD36
CD38
CD3D
CD4
CD40
CD40LG
CD44
CD47
CD55
CD6
CD68
CD79A
CD80
CD86
CD8A
CDC26
CDC42EP2
CDC5L
CDC7
CDCP1
CDH11
CDH2
CDK10
CDK14
CDK2AP1
CDK5RAP3
CDKN1A
CDKN2A
CDKN2B-AS1
CDR1-AS
CEACAM16
CEACAM21
CEACAM3
CEACAM4
CEACAM8
CEBPB
CEMIP
CENPP
CEP250
CERNA3
CFAP54
CFI
CFL1
CFLAR
CFTR
CH25H
CHAD
CHADL
CHD9
CHI3L1
CHI3L2
CHIA
CHIT1
CHKA
CHKB-CPT1B
CHRD
CHRDL2
CHRFAM7A
CHRNG
CHST11
CHST14
CHST3
CHUK
CIITA
CILP
CILP2
CINP
CIP2A
CIRBP
CKLF
CKM
CLCN5
CLCN7
CLCNKA
CLDN23
CLEC18A
CLEC3B
CLEC4A
CLK3
CLN3
CLU
CM034951-108
CM034955-345
CM034958-377
CM034958-378
CM034959-017
CM034959-238
CM034962-144
CM034965-181
CMKLR1
CNBD2
CNN1
CNR1
CNR2
COG4
COG5
COL10A1
COL11A1
COL11A2
COL12A1
COL18A1
COL1A1
COL1A2
COL20A1
COL27A1
COL2A1
COL3A1
COL4A1
COL4A5
COL5A1
COL5A2
COL6A1
COL6A3
COL6A4P1
COL6A4P2
COL9A1
COL9A2
COL9A3
COLGALT1
COLGALT2
COMMD4
COMP
COMT
CORT
COX5A
CP
CPEB1
CPLX3
CPNE1
CPSF6
CPT2
CR1
CRADD
CRADD-AS1
CRB3
CREB1
CREB3
CREB3L1
CRELD2
CRH
CRIPTO
CRLF1
CRMA
CRP
CRTAC1
CRTAP
CRTC1
CRY1
CRY2
CRYAB
CS
CSF1
CSF1R
CSF2
CSF2RA
CSF3
CSGALNACT1
CSK
CSMD1
CSNK1E
CSPG4
CST3
CSTA
CTBP1-DT
CTLA4
CTNNB1
CTSA
CTSB
CTSD
CTSG
CTSK
CTSL
CTSS
CUX1
CX3CL1
CX3CR1
CXADR
CXCL1
CXCL10
CXCL11
CXCL12
CXCL13
CXCL16
CXCL5
CXCL6
CXCL8
CXCL9
CXCR2
CXCR3
CXCR4
CXCR5
CXCR6
CYBA
CYCS
CYP11A1
CYP1A1
CYP1A2
CYP20A1
CYP26B1
CYP27B1
CYP2A13
CYP2A6
CYP2B6
CYP2C18
CYP2C19
CYP2C8
CYP2C9
CYP2D6
CYP2E1
CYP3A4
CYP3A5
CYP3A7
CYP7B1
CYTL1
CYTOR
DAGLB
DANCR
DBH
DCAF12
DCDC1
DCHS1
DCN
DCP1A
DCSTAMP
DDH1
DDH2
DDHD1
DDIT3
DDIT4
DDR1
DDR2
DDRGK1
DDX20
DDX23
DDX55
DEAF1
DEF6
DEFB103B
DEFB4A
DELEC1
DEPP1
DERL1
DERL2
DGCR5
DGCR8
DGKI
DIO2
DIO3
DKK1
DKK3
DLGAP1-AS2
DLL1
DLX3
DLX5
DMP1
DNAH10
DNAH8
DNAI2
DNAJB6
DNAJC22
DNM1P34
DNM3OS
DNMT1
DNMT3A
DNMT3B
DNTT
DOT1L
DPEP1
DPH1
DPP4
DPP7
DRD2
DSE
DSP
DSPP
DST
DSTN
DUS4L
DUSP1
DUSP19
DUSP5
DVL2
DYM
DYNC1I1
E2F1
ECM1
ECM1P2
ECRG4
EDA
EDC3
EDEM2
EDEM3
EDN1
EDNRA
EEIG1
EFEMP1
EFEMP2
EFNB2
EGF
EGR1
EHBP1L1
EHHADH-AS1
EIF1AD
EIF1B-AS1
EIF2B1
EIF4G2
EIF6
ELANE
ELDR
ELF3
ELN
ELOF1
EMILIN1
EMSLR
EMSY
EN1
ENG
ENO1
ENO2
ENPP1
ENSG00000197376
ENSG00000205537
ENSG00000207009
ENSG00000219682
ENSG00000227098
ENSG00000228352
ENSG00000231760
ENSG00000236457
ENSG00000236838
ENSG00000237174
ENSG00000238156
ENSG00000243696
ENSG00000248634
ENSG00000253926
ENSG00000254461
ENSG00000254632
ENSG00000255038
ENSG00000255310
ENSG00000255730
ENSG00000257042
ENSG00000257194
ENSG00000257955
ENSG00000257985
ENSG00000258216
ENSG00000258365
ENSG00000260103
ENSG00000260274
ENSG00000260773
ENSG00000260947
ENSG00000261118
ENSG00000261384
ENSG00000261578
ENSG00000262810
ENSG00000268218
ENSG00000269514
ENSG00000269971
ENSG00000271547
ENSG00000275431
ENSG00000277310
ENSG00000279093
ENSG00000280309
ENSG00000280333
ENSG00000280904
ENSG00000285108
ENSG00000286417
ENSG00000286696
ENSG00000288703
ENSG00000289715
ENSG00000291336
EP300
EPAS1
EPCAM
EPHB4
EPYC
EQTN
ERAP1
ERAP2
ERCC4
ERCC6L2-AS1
ERG
ERGIC3
ERI1
ERP27
ERV3-1
ERVK-18
ESD
ESR1
ESR2
ESRRB
ETS1
ETS2
EXT1
EXT2
EXTL2
EYA1
EZH2
F2RL1
F2RL3
F3
F8
F9
FAAH
FAAP24
FABP2
FABP4
FAH
FALEC
FAM111B
FAM136A
FAM20B
FAM20C
FAM225A
FAM53A
FAM83C
FAM83C-AS1
FAM86B3P
FAM98A
FANCA
FANCE
FAP
FAS
FASLG
FAUP4
FBLN1
FBLN2
FBLN5
FBN1
FBN2
FBP1
FBXL19-AS1
FBXO21
FBXW7
FCGR1A
FCGR2B
FER1L4
FFAR4
FGD5-AS1
FGF1
FGF10
FGF18
FGF2
FGF21
FGF23
FGF3
FGF7
FGF8
FGF9
FGFR1
FGFR2
FGFR3
FHIT
FILIP1
FIP1L1
FIS1
FJ601676
FJ601684-132
FKBP10
FKBP14
FKBP14-AS1
FKBP5
FLJ42393
FLNA
FLT1
FLT3LG
FMOD
FMR1
FN1
FNDC5
FOLR2
FOS
FOSL1
FOXC1
FOXD1
FOXD2-AS1
FOXM1
FOXO1
FOXO3
FOXP2
FOXP3
FOXP4
FPR2
FRMD8
FRMPD1
FRZB
FSTL1
FTO
FTO-IT1
FURIN
FUT1
FUT4
FYCO1
FZD8
GAL
GALC
GALE
GALNS
GALNT15
GANAB
GAPDH
GAS5
GAS6
GBA1
GBA2
GC
GDF5
GDF5-AS1
GDNF
GEM
GFM1
GGT1
GGT7
GH1
GHR
GHRH
GHRHR
GHRL
GJA1
GLA
GLB1
GLIS3
GLIS3-AS2
GLP1R
GLRA1
GLRX
GLT8D1
GLUL
GML
GNAS
GNAS-AS1
GNL3
GNPTAB
GNS
GOLGB1
GORAB
GP1BA
GP6
GPC3
GPD1L
GPI
GPM6A
GPNMB
GPR101
GPR143
GPR22
GPR33
GPT
GPX3
GRASLND
GREM1
GRIN2B
GRINA
GRN
GSDMC
GSR
GSTM1
GSTP1
GSTT1
GUCY2EP
GUSB
GUSBP2
GZMA
GZMB
H1-2
H1-3
H1-4
H1-7
H19
H2AC5P
H2AC6
H2BC4
H2BC9
H3-3B
H3-7
H3C1
H3C12
H3C13
H3C14
H3C3
H3P27
H4C16
HABP2
HABP4
HAPLN1
HAPLN3
HAS1
HAS2
HAS2-AS1
HAVCR2
HBB
HBEGF
HBP1
HCCAT5
HCFC1
HCG11
HCG18
HDAC1
HDAC2
HDAC4
HDAC7
HDAC9
HELLPAR
HES1
HES5
HEXB
HEXD
HFE
HFE-AS1
HGD
HGF
HGFAC
HHIP
HIC1
HIF1A
HIF3A
HIVEP2-DT
HK2
HLA-A
HLA-B
HLA-DMA
HLA-DPA1
HLA-DPB1
HLA-DQA1
HLA-DQA2
HLA-DQB1
HLA-DRB1
HLA-G
HMGA2
HMGB1
HMGB2
HMGCR
HMGN4
HMMR
HMOX1
HNF1A-AS1
HNRNPA1P16
HNRNPUL1
HORMAD1
HOTAIR
HOTAIRM1
HOTTIP
HOXA1
HOXA-AS3
HOXD11
HP
HPD
HPGD
HPSE
HPX
HRH2
HRH4
HS6ST2
HSALNG0007046
HSALNG0010680
HSALNG0015811
HSALNG0015815
HSALNG0015906
HSALNG0017617
HSALNG0020226-451
HSALNG0020226-469
HSALNG0025653
HSALNG0025655
HSALNG0026174
HSALNG0031532
HSALNG0031533
HSALNG0046567
HSALNG0048733
HSALNG0050293
HSALNG0050296
HSALNG0050313
HSALNG0050314
HSALNG0054882
HSALNG0059707
HSALNG0061637
HSALNG0063403
HSALNG0069708
HSALNG0069709
HSALNG0073878
HSALNG0078751
HSALNG0090817
HSALNG0092957
HSALNG0092966
HSALNG0093138
HSALNG0094715
HSALNG0094803
HSALNG0111532
HSALNG0113871
HSALNG0115820
HSALNG0123949
HSALNG0126180
HSALNG0142420
HSALNG0143222
HSALNG0144148
HSALNG0145747
HSALNG0145935
HSALNG0148026
HSALNG0149108
HSD11B1
HSH2D
HSP90B1
HSPA4
HSPA5
HSPA8
HSPD1
HSPG2
HTR2A
HTRA1
HULC
HYAL1
HYAL2
IBSP
ICA1L
ICAM1
ICAM3
IDS
IDUA
IFITM5
IFNB1
IFNG
IFNL1
IFRD1
IGF1
IGF2
IGF2BP3
IGFALS
IGFBP1
IGFBP2
IGFBP3
IGFBP5
IGFBP7
IHH
IKBKB
IKBKE
IL10
IL10RA
IL11
IL12A
IL13
IL15
IL15RA
IL16
IL17A
IL17B
IL17F
IL17RA
IL17RC
IL18
IL18BP
IL18R1
IL18RAP
IL1A
IL1B
IL1F10
IL1R1
IL1R2
IL1RAP
IL1RAPL2
IL1RL1
IL1RL2
IL1RN
IL2
IL21
IL21R
IL22
IL22RA1
IL23A
IL23R
IL24
IL26
IL27
IL2RA
IL2RB
IL2RG
IL3
IL32
IL33
IL34
IL36A
IL37
IL4
IL4R
IL5
IL6
IL6R
IL6ST
IL7
IL7R
IL9
ILF3
ILF3-DT
ILRUN
ILRUN-AS1
IMPG2
INHBA
INS
IPO8
IQCH
IQCH-AS1
IRAK3
IRF1
IRF2BPL
IRF5
IRX2-DT
IRX3
ISG20
ISLR
ISLR2
ISOC1
ITCH
ITGA1
ITGA4
ITGA5
ITGAL
ITGAM
ITGAV
ITGB1
ITGB2
ITGB3
ITGB5
ITIH1
ITIH4
ITLN1
JAG1
JAM3
JRKL
JUN
JUNB
JUND
KANSL2
KAT5
KAZALD1
KBTBD13
KCNJ11
KCNJ5
KCNK15-AS1
KCNK7
KCNMA1
KCNQ1OT1
KCNQ2
KCNQ3
KCTD13
KDELR2
KDM1A
KDM4B
KDM6B
KEAP1
KHDRBS1
KIF12
KIF21A
KIF21B
KIF22
KIF24
KIR2DS4
KIT
KL
KLC2-AS1
KLF2
KLF3-AS1
KLF4
KLF5
KLF9
KLK11
KLRB1
KMT2D
KNG1
KNTC1
KPNA2
L13304-005
L13304-010
L13304-025
L13715-004
L13715-018
L3MBTL2
LACC1
LAG3
LAMA5
LAMP1
LAMP2
LAMP3
LAYN
LCN2
LDHB
LECT2
LEF1
LEMD1-AS1
LEP
LEPQTL1
LEPR
LETR1
LGALS1
LGALS3
LGALS3BP
LGALS4
LGALS8
LGALS9
LGR4
LGR5
LIF
LINC00092
LINC00114
LINC00265
LINC00293
LINC00310
LINC00313
LINC00473
LINC00511
LINC00623
LINC00654
LINC00662
LINC00665
LINC00680
LINC00707
LINC00958
LINC00976
LINC00977
LINC01060
LINC01094
LINC01154
LINC01191
LINC01242
LINC01370
LINC01411
LINC01554
LINC01614
LINC01672
LINC01695
LINC01783
LINC01793
LINC01865
LINC01874
LINC01875
LINC02009
LINC02154
LINC02210
LINC02328
LINC02399
LINC02458
LINC02596
LINC02605
LINC02742
LINC02758
LINC02888
LINC02980
LINC03126
LINC-ROR
LIPA
LMNA
LMNB1
LMX1B
lnc-ADAMTSL4-1
lnc-ADD2-2
lnc-APOBEC4-5
lnc-C2orf40-9
lnc-C6orf106-2
lnc-CCDC33-6
lnc-CDK2AP1-1
lnc-CMKLR1-3
lnc-COLGALT2-1
lnc-COLGALT2-6
lnc-CTDSP2-7
lnc-FAM83C-2
lnc-GLIS3-2
lnc-GORASP1-1
lnc-HFM1-3
lnc-IQCH-7
lnc-KCNK7-4
lnc-KIF12-2
lnc-KIF12-3
lnc-KLHL42-2
lnc-LYPLAL1-11
lnc-LYPLAL1-9
lnc-MANBA-4
lnc-MCL1-8
lnc-MDFIC-7
lnc-NEK4-1
LNCRNA-ATB
lnc-RTN4RL1-1
lnc-SOCS2-6
lnc-SSSCA1-1
lnc-TACC3-2
lnc-TACC3-3
lnc-TIMM29-1
lnc-TMEM106C-4
lnc-UBL7-2
lnc-ZNF618-2
LOC100130744
LOC101448202
LOC101927839
LOC101928540
LOC101929268
LOC101929770
LOC102723692
LOC105369750
LOC105369787
LOC105369890
LOC105376225
LOC105379168
LOC106050102
LOC106627981
LOC106728418
LOC107985895
LOC109461476
LOC110283621
LOC111365141
LOC112543491
LOC124900223
LOC124900366
LOC124900379
LOC124900668
LOC124901701
LOC124902255
LOC124902823
LOC124902927
LOC124903077
LOC124903525
LOC124903691
LOC124904657
LOC126806446
LOC126861318
LOC126862124
LOC126862264
LOC126862586
LOC129930561
LOC129936436
LOC129999735
LOC130009838
LOC130057352
LOC130059892
LOC130061867
LOC130068781
LOC157273
LOC654780
LONP1
LOX
LOXL1-AS1
LOXL2
LOXL3
LPA
LPAR1
LPCAT3
LPL
LRCH1
LRG1
LRIG3
LRP1
LRP2
LRP5
LRP6
LRRC15
LRRC37A4P
LRRK2
LSP1P3
LTA
LTBP1
LTBP3
LTBR
LTF
LUM
LURAP1L-AS1
LVRN
LXN
LY96
LYPLAL1
LYPLAL1-AS1
LYRM4-AS1
LYVE1
LZTFL1
MAD2L1-DT
MAF
MAFB
MALAT1
MALT1
MAML2
MAN2B1
MAN2C1
MANSC4
MAP1LC3A
MAP2K1
MAP2K4
MAP2K6
MAP2K7
MAP3K11
MAP3K2
MAP3K4
MAP3K5
MAP3K7
MAP3K8
MAP3K9
MAP7
MAPK1
MAPK10
MAPK14
MAPK3
MAPK8
MAPT
MATN1
MATN3
MATN4
MAZ
MBTPS2
MC1R
MCAM
MCF2L
MCM3AP-AS1
MCOLN1
MDFIC
MDS2
ME2P1
MECP2
MEFV
MEG3
MEGF9
MELK
MELTF-AS1
MEN1
MEPE
MESD
METRNL
METTL15
METTL16
METTL3
MFAP4
MFGE8
MFN2
MG828730-051
MGAM
MGP
MIA3
MIAT
MICA
MICAL3
MID1
MIF
MIR101-1
MIR103A2
MIR105-1
MIR106A
MIR107
MIR10B
MIR1179
MIR1183
MIR1197
MIR1202
MIR1207
MIR122
MIR1225
MIR1227
MIR1236
MIR1238
MIR124-1
MIR124-3
MIR1246
MIR1248
MIR125A
MIR125B1
MIR125B2
MIR126
MIR1260A
MIR1260B
MIR1262
MIR1265
MIR127
MIR1275
MIR1277
MIR128-1
MIR128-2
MIR1289-1
MIR129-1
MIR129-2
MIR1299
MIR130A
MIR130B
MIR132
MIR1323
MIR133B
MIR135A1
MIR136
MIR137
MIR138-1
MIR138-2
MIR139
MIR140
MIR141
MIR142
MIR144
MIR145
MIR146A
MIR146B
MIR147B
MIR148A
MIR149
MIR150
MIR151A
MIR151B
MIR152
MIR153-1
MIR155
MIR15A
MIR16-1
MIR16-2
MIR17
MIR17HG
MIR181A1
MIR181A2
MIR181B1
MIR181C
MIR182
MIR183
MIR184
MIR185
MIR186
MIR18A
MIR190A
MIR193A
MIR193B
MIR195
MIR196A2
MIR197
MIR199A1
MIR199A2
MIR199B
MIR19A
MIR19B1
MIR200A
MIR200B
MIR200CHG
MIR203A
MIR204
MIR206
MIR208B
MIR20A
MIR20B
MIR21
MIR210
MIR211
MIR214
MIR215
MIR216A
MIR217
MIR22
MIR221
MIR222
MIR223
MIR224
MIR22HG
MIR2355
MIR23A
MIR23B
MIR24-1
MIR24-2
MIR26A1
MIR26B
MIR27A
MIR27B
MIR296
MIR29A
MIR29B1
MIR29B2
MIR29C
MIR300
MIR301A
MIR3065
MIR30A
MIR30B
MIR30C1
MIR30E
MIR31
MIR3128
MIR3143
MIR3148
MIR31HG
MIR320A
MIR320B2
MIR320C1
MIR320D1
MIR320E
MIR324
MIR328
MIR335
MIR337
MIR338
MIR33A
MIR33B
MIR342
MIR345
MIR346
MIR34A
MIR34C
MIR3605
MIR361
MIR365A
MIR3680-1
MIR3680-2
MIR370
MIR373
MIR374A
MIR374B
MIR375
MIR376A1
MIR376B
MIR377
MIR379
MIR381
MIR3909
MIR3922
MIR3960
MIR410
MIR411
MIR423
MIR424
MIR425
MIR4281
MIR4284
MIR4307
MIR4326
MIR433
MIR4432
MIR4435-2
MIR4435-2HG
MIR4470
MIR4487
MIR4492
MIR4498
MIR449A
MIR4516
MIR451A
MIR454
MIR455
MIR4654
MIR4693
MIR4772
MIR4804
MIR483
MIR485
MIR486-1
MIR488
MIR494
MIR497
MIR498
MIR499A
MIR500B
MIR501
MIR502
MIR505
MIR5194
MIR519B
MIR543
MIR558
MIR5700
MIR577
MIR582
MIR584
MIR590
MIR591
MIR599
MIR6069
MIR615
MIR616
MIR634
MIR641
MIR6515
MIR655
MIR663A
MIR665
MIR671
MIR675
MIR6786
MIR7-3HG
MIR761
MIR8072
MIR8082
MIR885
MIR9-1
MIR9-2
MIR92A1
MIR92A2
MIR92B
MIR9-2HG
MIR93
MIR9-3
MIR940
MIR944
MIR98
MIR99A
MIR99B
MIRLET7A1
MIRLET7A2
MIRLET7A3
MIRLET7B
MIRLET7C
MIRLET7E
MIRLET7F1
MIRLET7F2
MIRLET7G
MITF
MK280269-045
MKRN2OS
MKX
MLXIP
MMP1
MMP10
MMP11
MMP12
MMP14
MMP15
MMP16
MMP17
MMP19
MMP24
MMP24OS
MMP28
MMP7
MMP8
MN297987
MN308750
MNT
MNX1
MNX1-AS2
MOB3B
MPHOSPH9
MPI
MRC1
MRC2
MROCKI
MRPL11
MRPS21
MS4A13
MS4A19P
MSH6
MST1R
MSTN
MTHFR
MTMR2
MTND4P14
MTOR
MTRF1LP2
MTRFR
MT-TK
MT-TR
MUS81
MUSTN1
MUTYH
MYC
MYD88
MYDGF
MYH11
MYH14
MYH7
MYH9
MYLK
MYO18B
MYO5A
MYOSLID
NABP1
NACA2
NAGLU
[truncated: 918 more rows]

## Sheet: 分子对接表
靶点	Degree	成分		number	ingredinet	Terget	Affinity value(Kcal/mol)
AKT1	25	arbutin		1	arbutin	SRC	-6.9
EGFR	20	glucosyringic acid		2	guajavarin	SRC	-9.5
MMP9	20	guajavarin		3	kaempferol	SRC	-8
SRC	20	kaempferol		4	guajavarin	EGFR	-8.1
MMP2	16			5	kaempferol	EGFR	-7.7
ABCB1	12
CYP19A1	8
	arbutin	glucosyringic acid	guajavarin	kaempferol
AKT1	-5.4	-5.5	-6.2	6	P31749	1h10
EGFR	-6.3	-6.1	-8.1	-7.7	P00533	1m14
MMP9	0	0	0	0	P14780	1gkc
SRC	-6.9	-6.4	-9.5	-8	P12931	1a07
MMP2	-3	-2.8	-3.5	-3.7	P08253	1gen
ABCB1	0	0	0	0	P08183	6c0v
CYP19A1	-5.2	-5.5	-6.3	-5.5	P11511	5jkv

## Sheet: 靶点条形图
Target	count	color
ABCC1	3	1
AKR1C1	3	1
CSNK2A1	4	1
MMP13	4	1
ESRRA	4	1
CA2	4	1
ALK	5	1
CYP1B1	5	1
XDH	5	1
MAOA	6	1
ALOX5	6	1
TYR	7	1
CXCR1	7	1
MMP3	7	1
CYP19A1	8	1
MPO	9	1
AXL	9	1
PIK3R1	10	1
NOX4	11	1
PTK2	11	1
ABCB1	12	1
MET	13	1
GSK3B	13	1
IGF1R	13	1
KDR	14	1
MMP2	16	1
EGFR	20	1
MMP9	20	1
SRC	20	1
AKT1	25	1
